# Supplementary material for: Synthesis, and evaluation of novel low nanomolar isoindigo-based RET kinase inhibitors
Source: Royal Society of Chemistry journal article supplement (doi:10.1039/d6ra01152g), 2026-04-24
Supplement: d6ra01152g1.pdf [file d6ra01152g1.pdf]

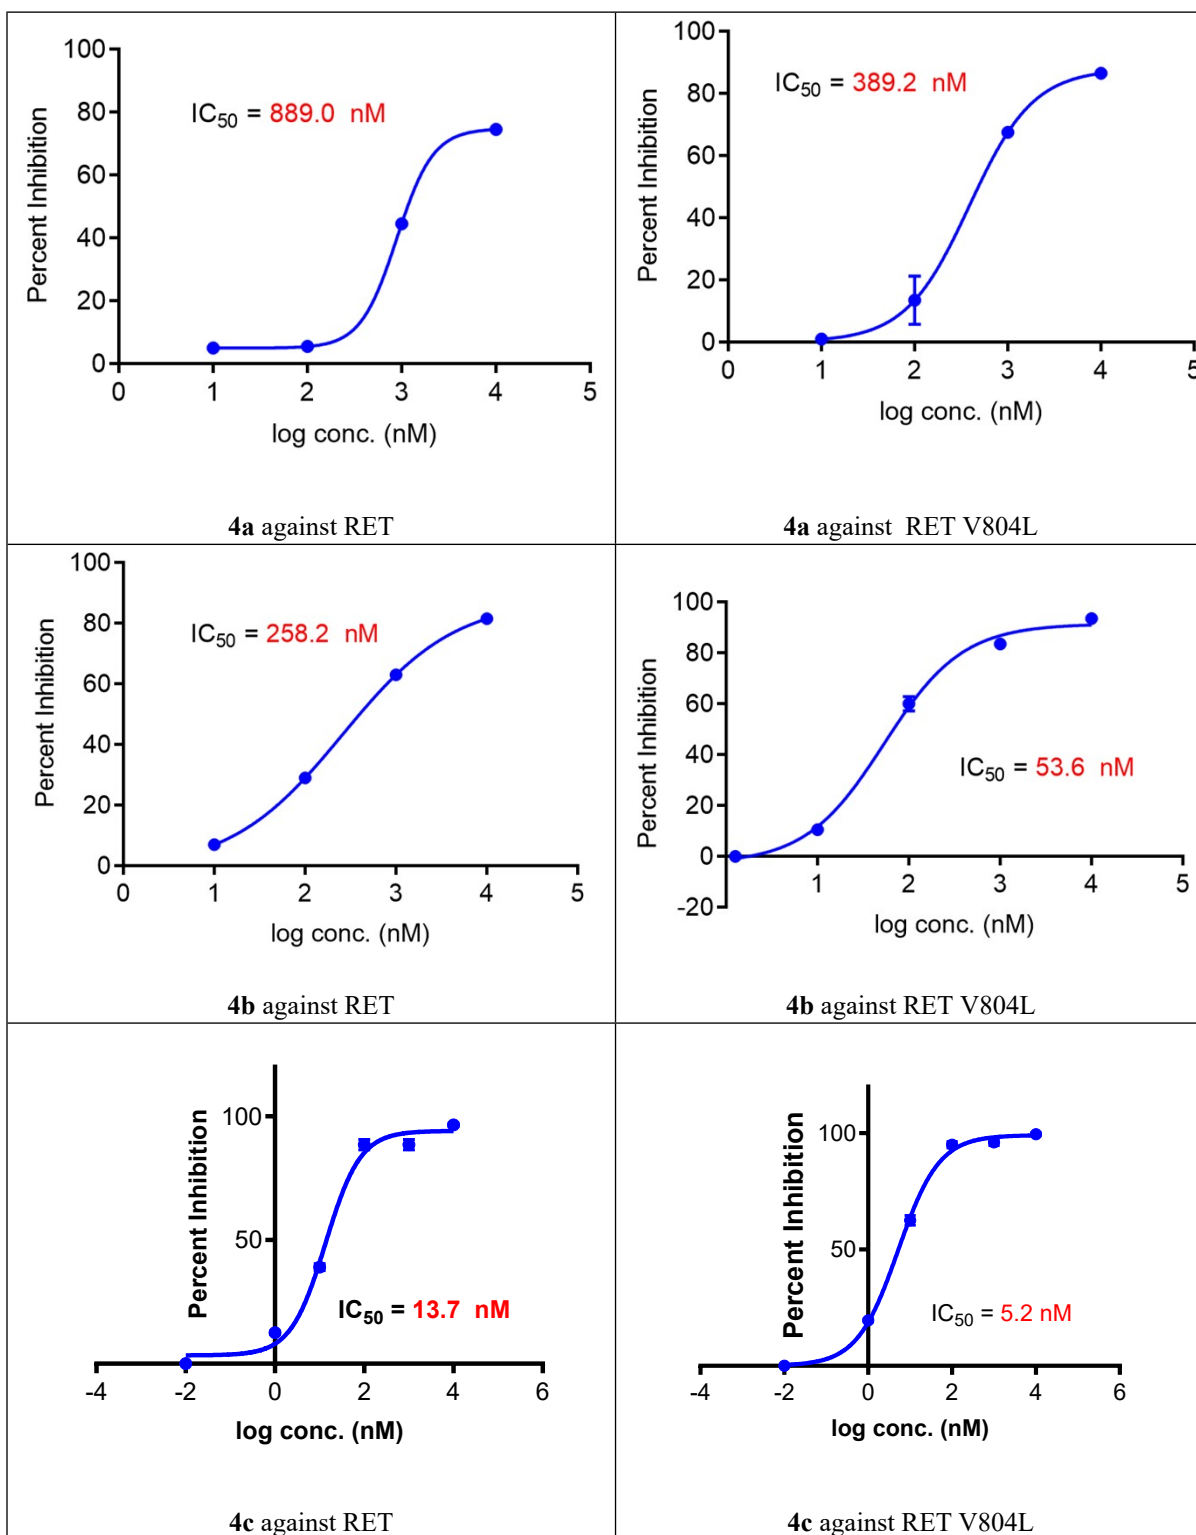

**Figure S1.** Dose response curves of compounds **4a-c** against **RET** and **RET V804L**

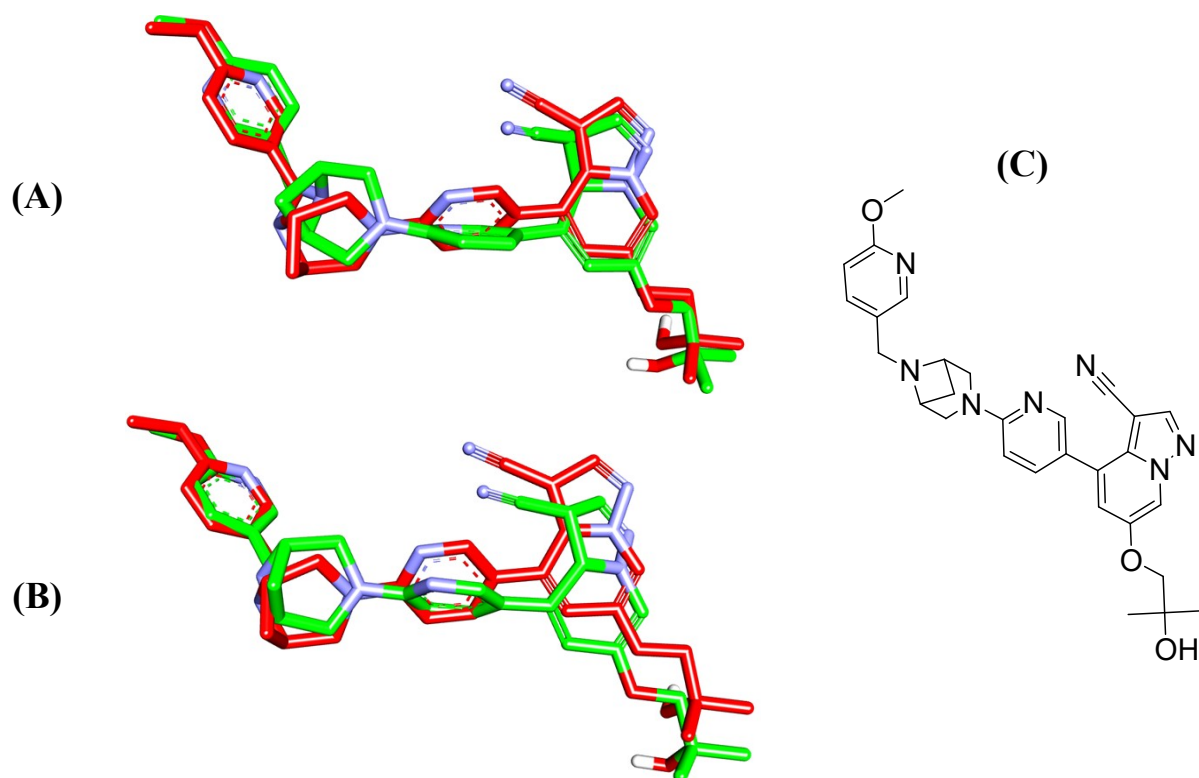

**Figure S2-A:** Docking veracity. Comparison between docked poses (green) and crystallographic bound poses (red) of selpercatinib: **(A)** within wild type RET kinase (PDB code: 7JU6), **(B)** within a homology model of RET kinase produced by manually replacing Val804 with Leu804. **(C)** The chemical structure of selpercatinib (anti-RET  $IC_{50}$  = 0.4 to 531 nM).

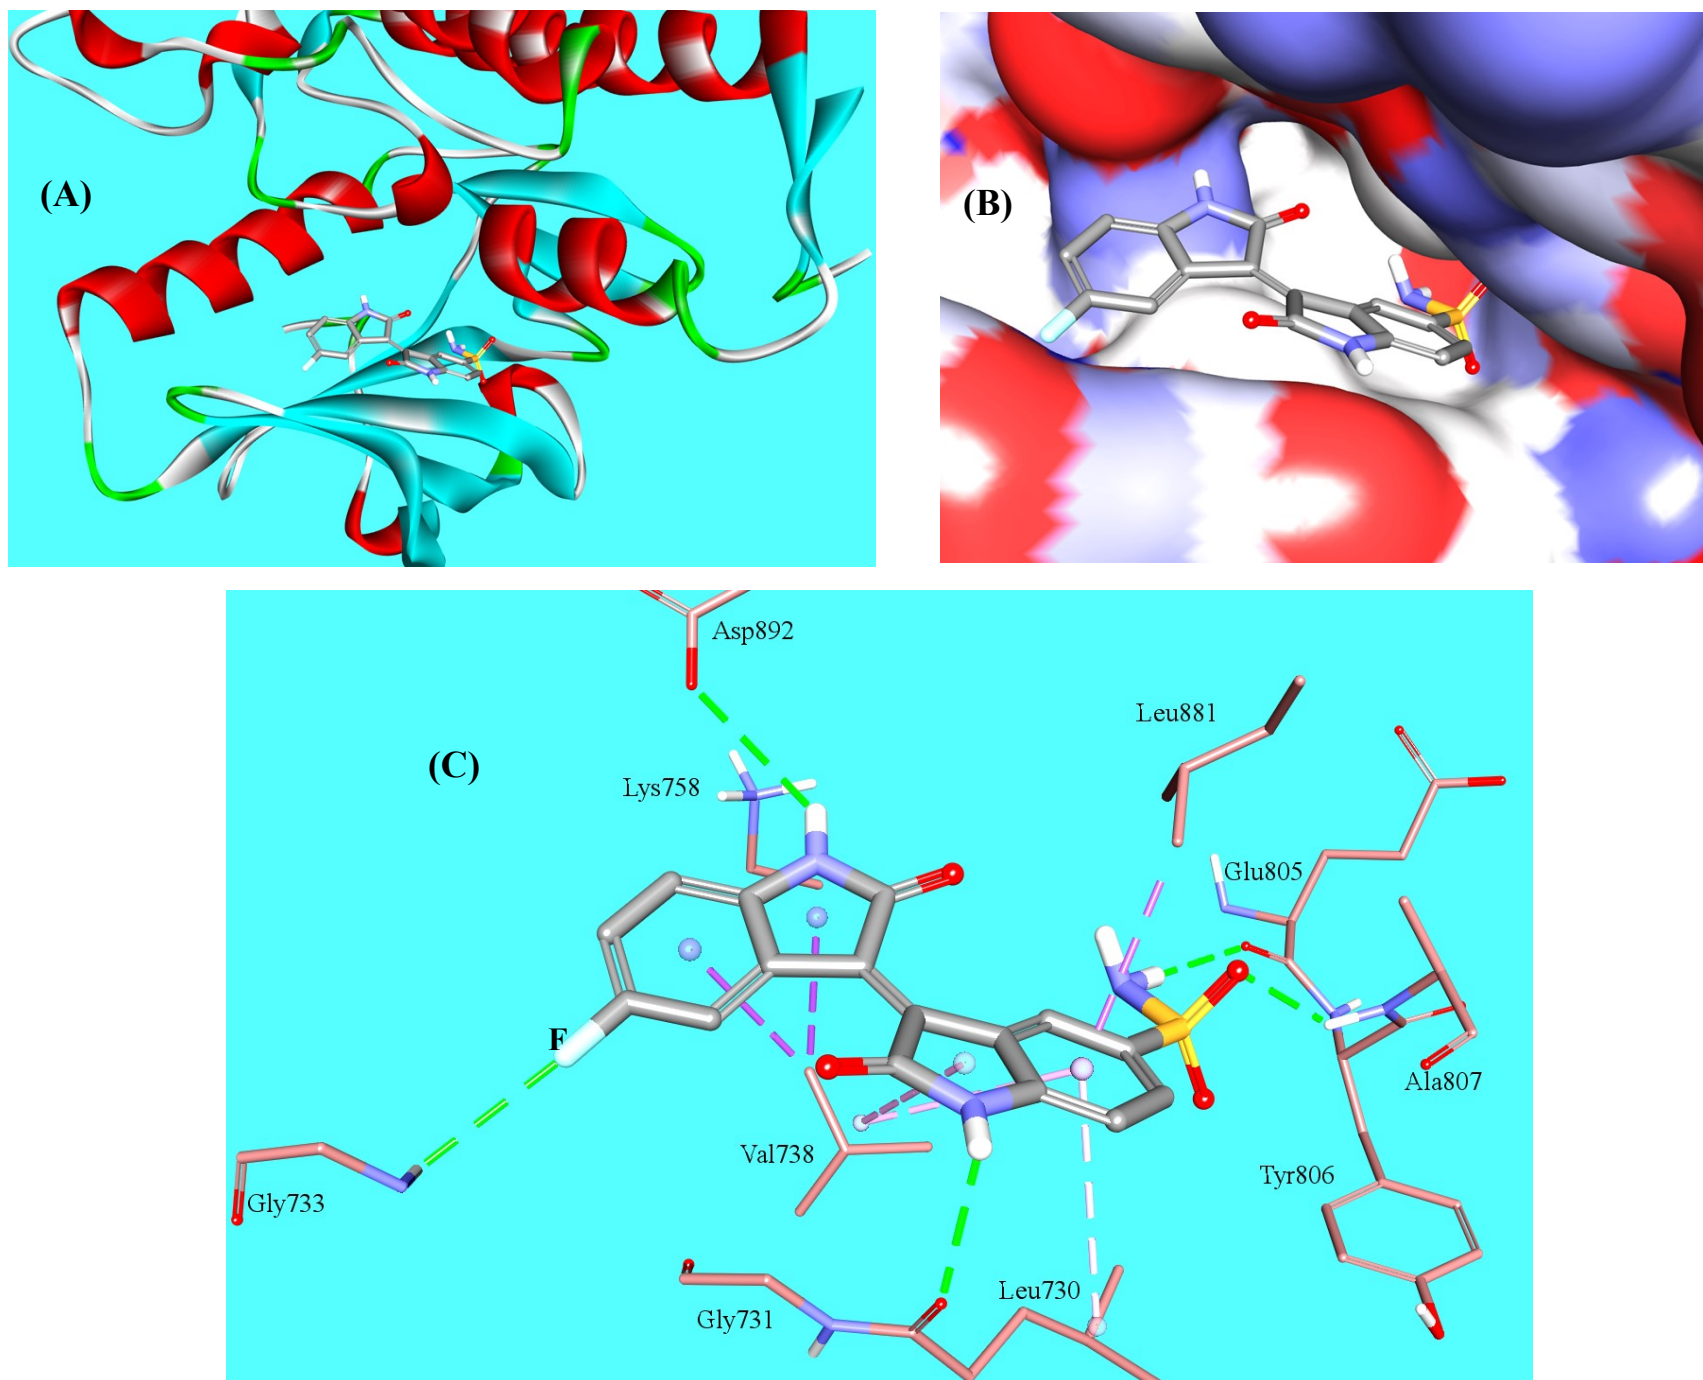

**Figure S2-B: 4a docked into wild type RET kinase. (A)** Panoramic view of the docked complex. **(B)** The docked ligand within the binding pocket covered by Connolly surface solvent accessible surface. **(C)** Detailed view of the docked complex showing interaction details. Hydrogen bonds are represented as green dotted lines, hydrophobic interactions are represented as white, pink or light-pink dotted lines.

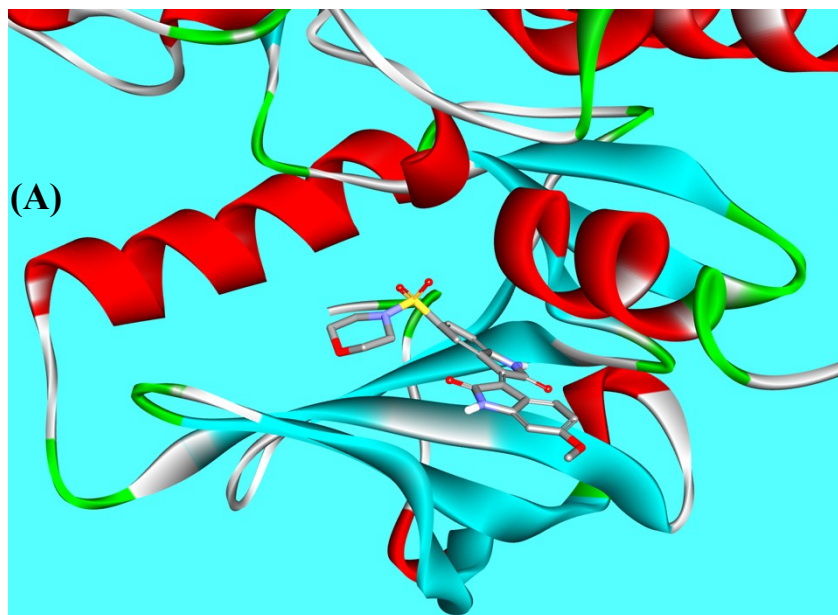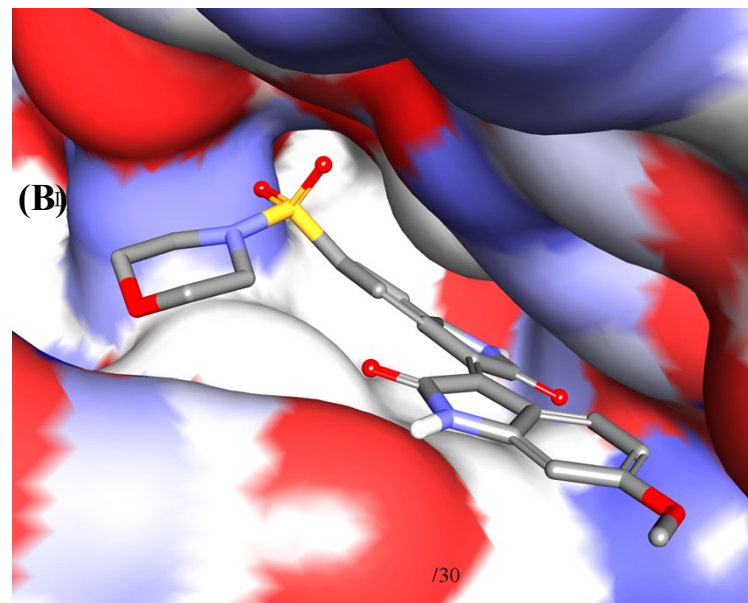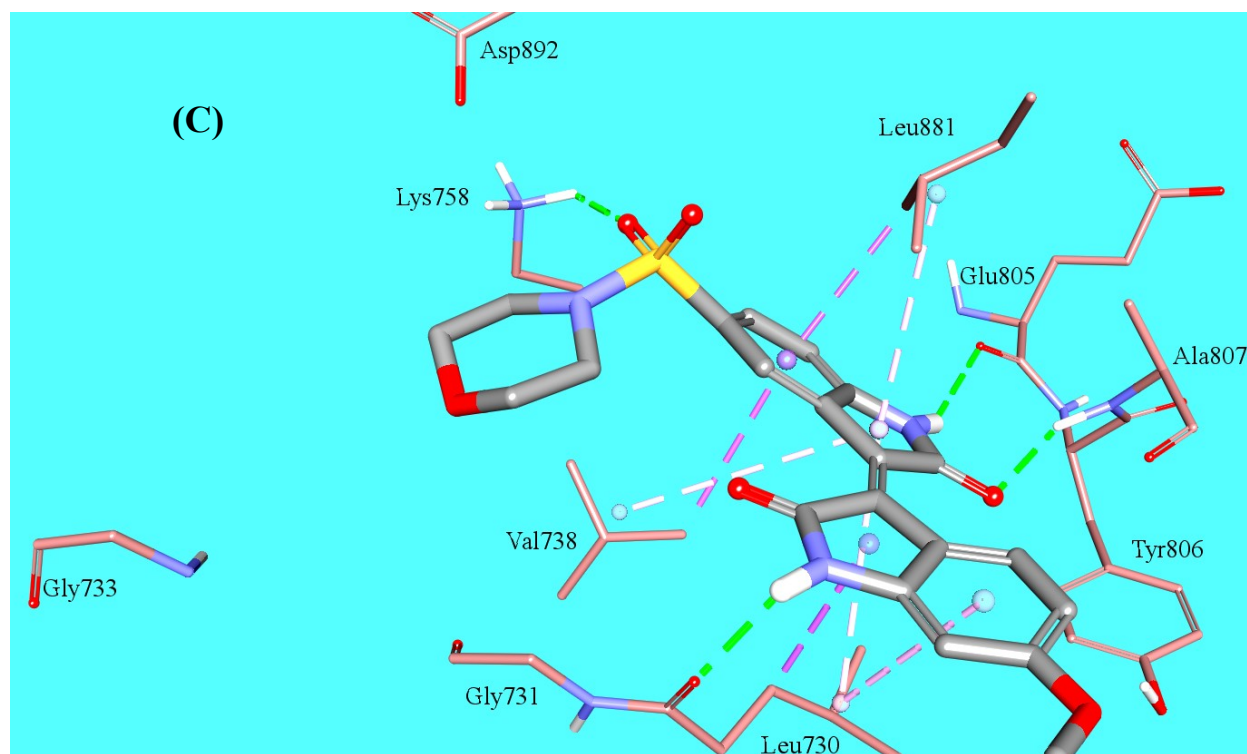

**Figure S2-C: 4b** docked into wild type RET kinase. (A) Panoramic view of the docked complex. (B) The docked ligand within the binding pocket covered by Connolly surface solvent accessible surface. (C) Detailed view of the docked complex showing interaction details. Hydrogen bonds are represented as green dotted lines, hydrophobic interactions are represented as white, pink or light-pink dotted lines.

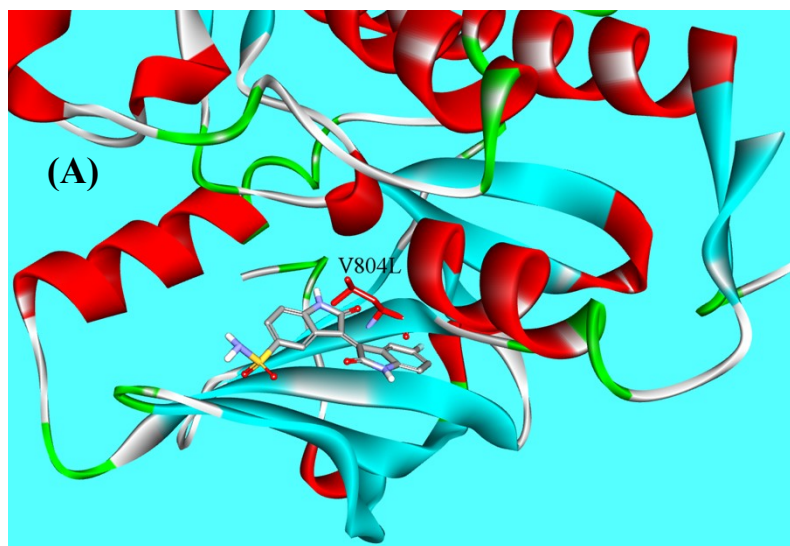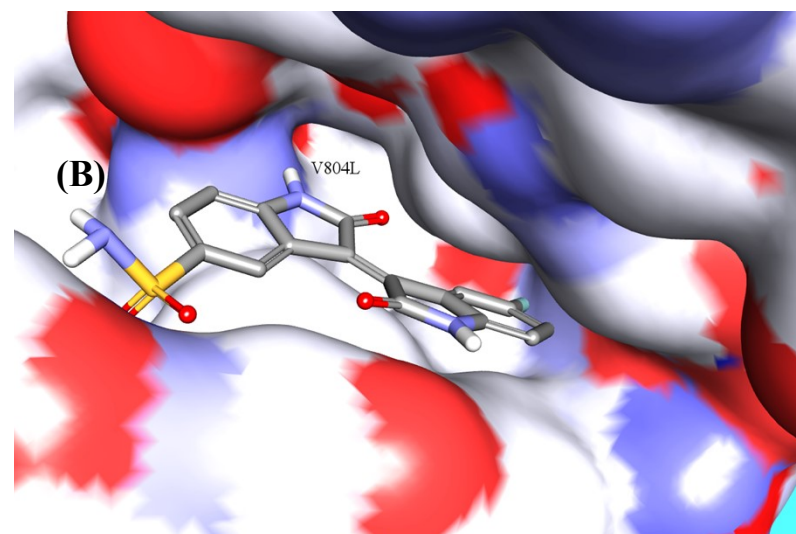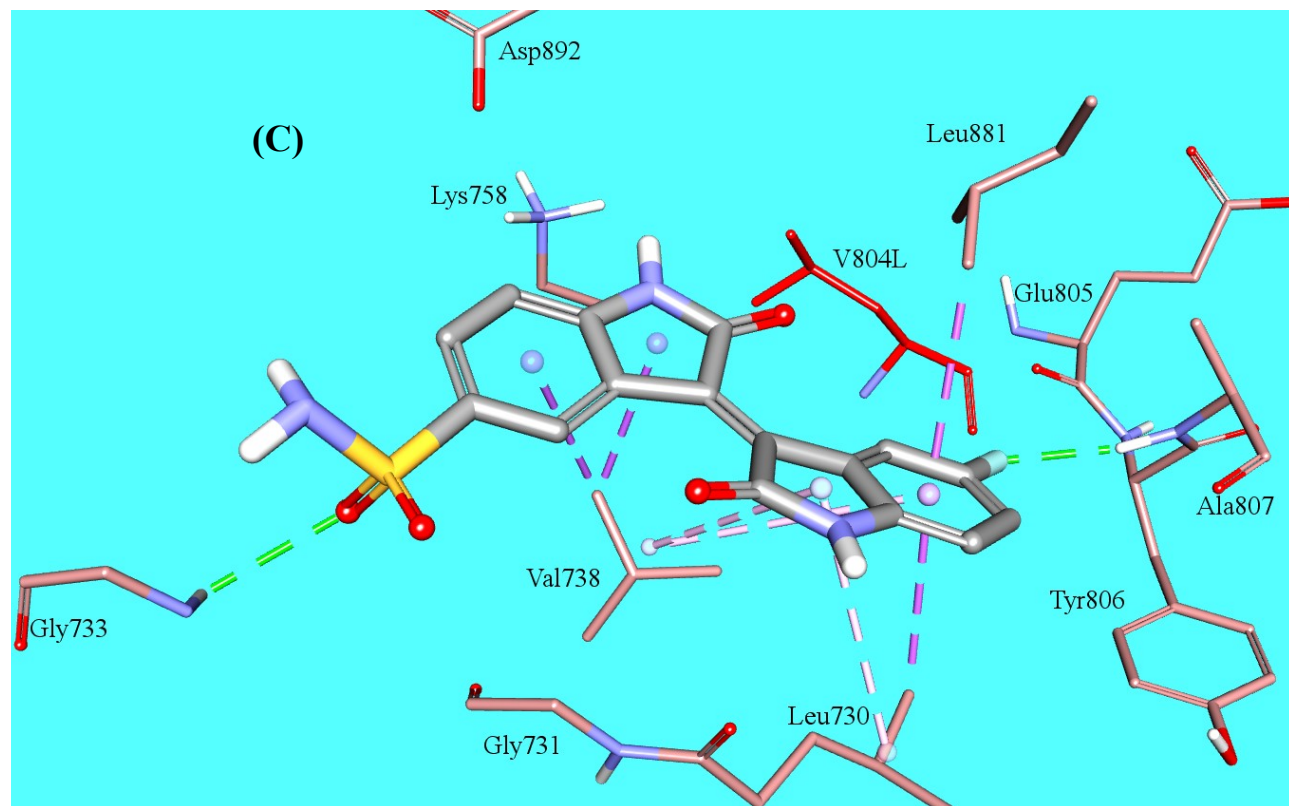

**Figure S2-D:** **4a** docked into V804L RET kinase. (A) Panoramic view of the docked complex. (B) The docked ligand within the binding pocket covered by Connolly surface solvent accessible surface. (C) Detailed view of the docked complex showing interaction details. Hydrogen bonds are represented as green dotted lines; hydrophobic interactions are represented as white, pink or light-pink dotted lines. The V804L mutation site is shown in red.

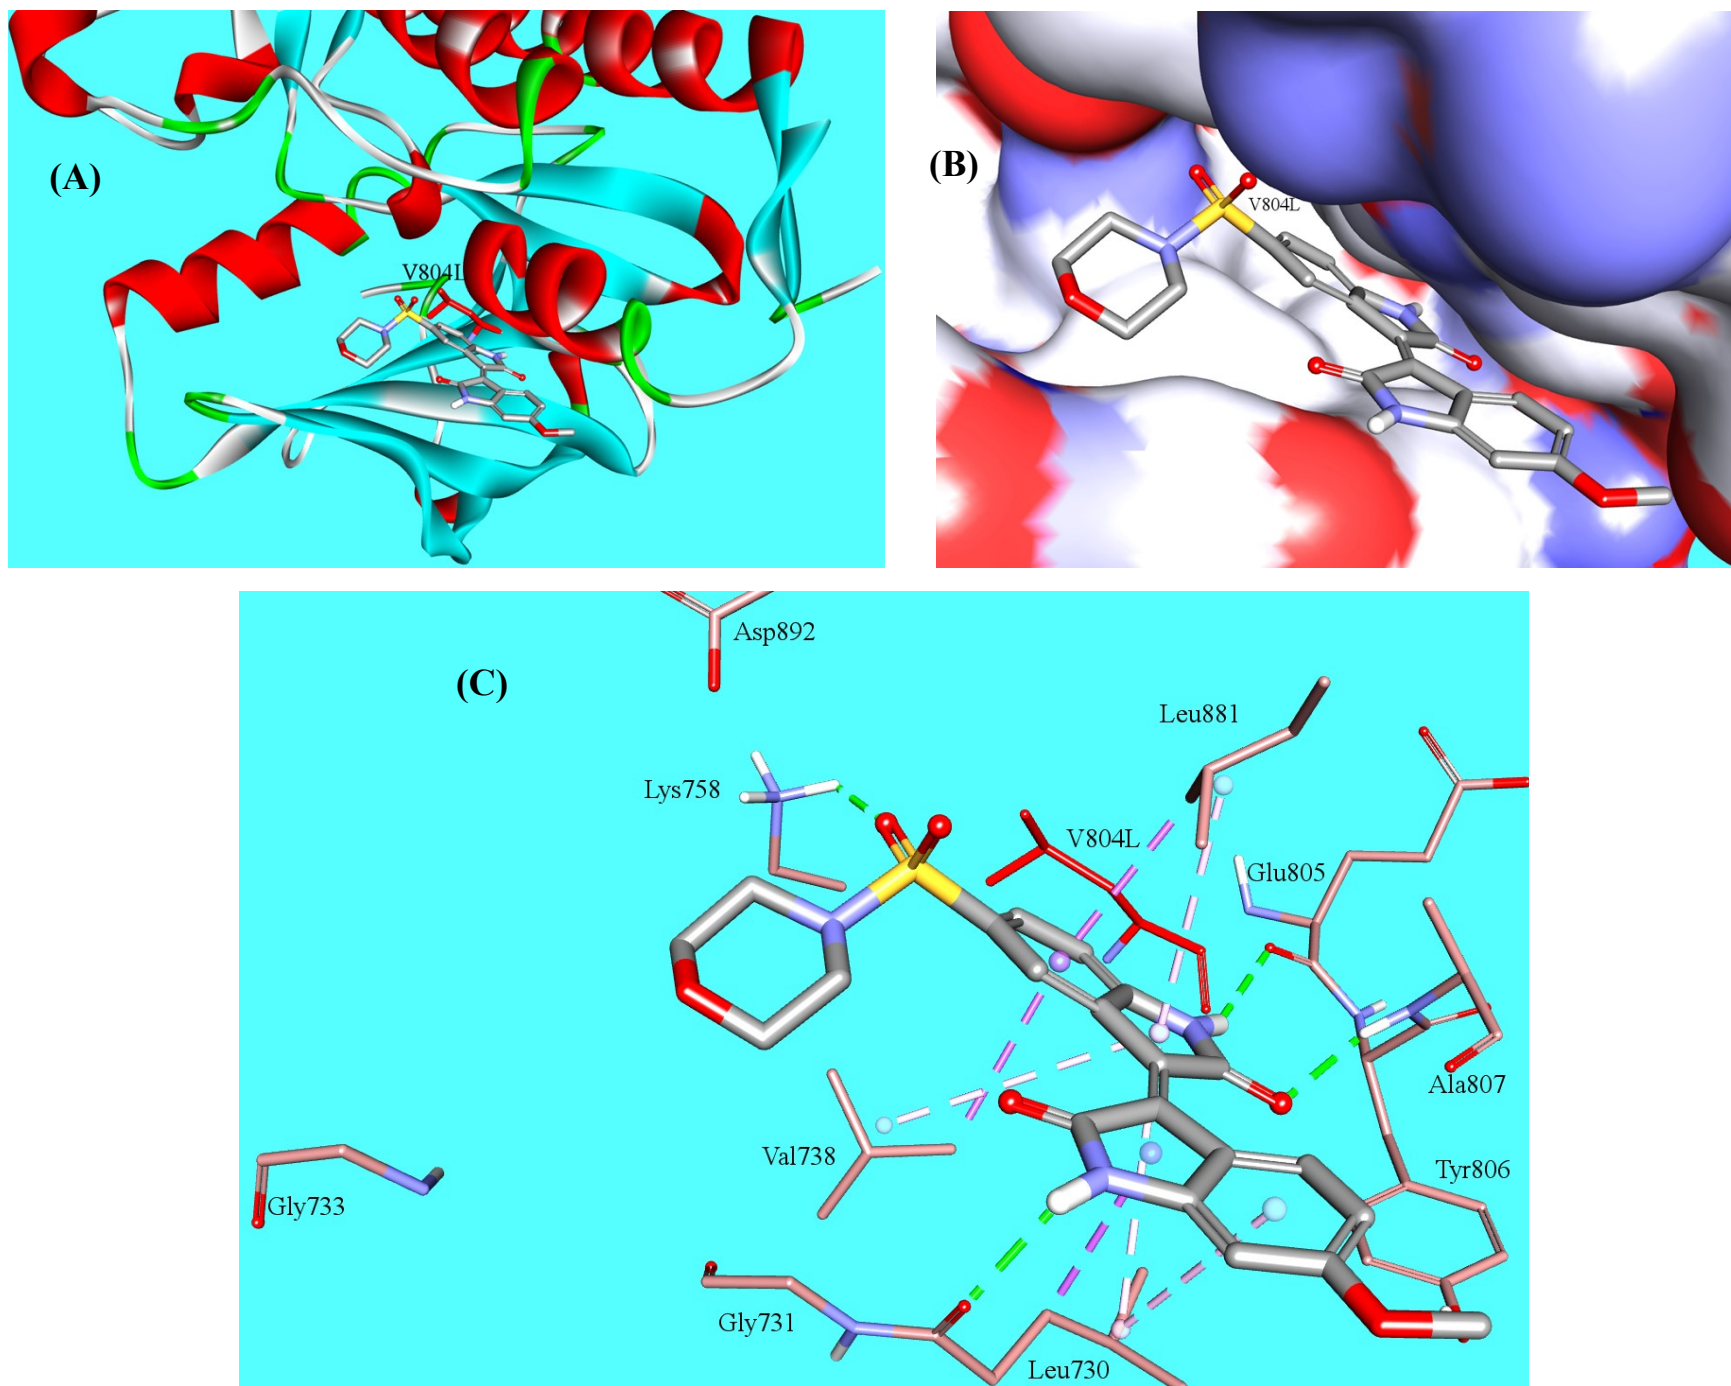

**Figure S2-E: 4b docked into V804L RET kinase. (A)** Panoramic view of the docked complex. **(B)** The docked ligand within the binding pocket covered by Connolly surface solvent accessible surface. **(C)** Detailed view of the docked complex showing interaction details. Hydrogen bonds are represented as green dotted lines; hydrophobic interactions are represented as white, pink or light-pink dotted lines. The V804L mutation site is shown in red.

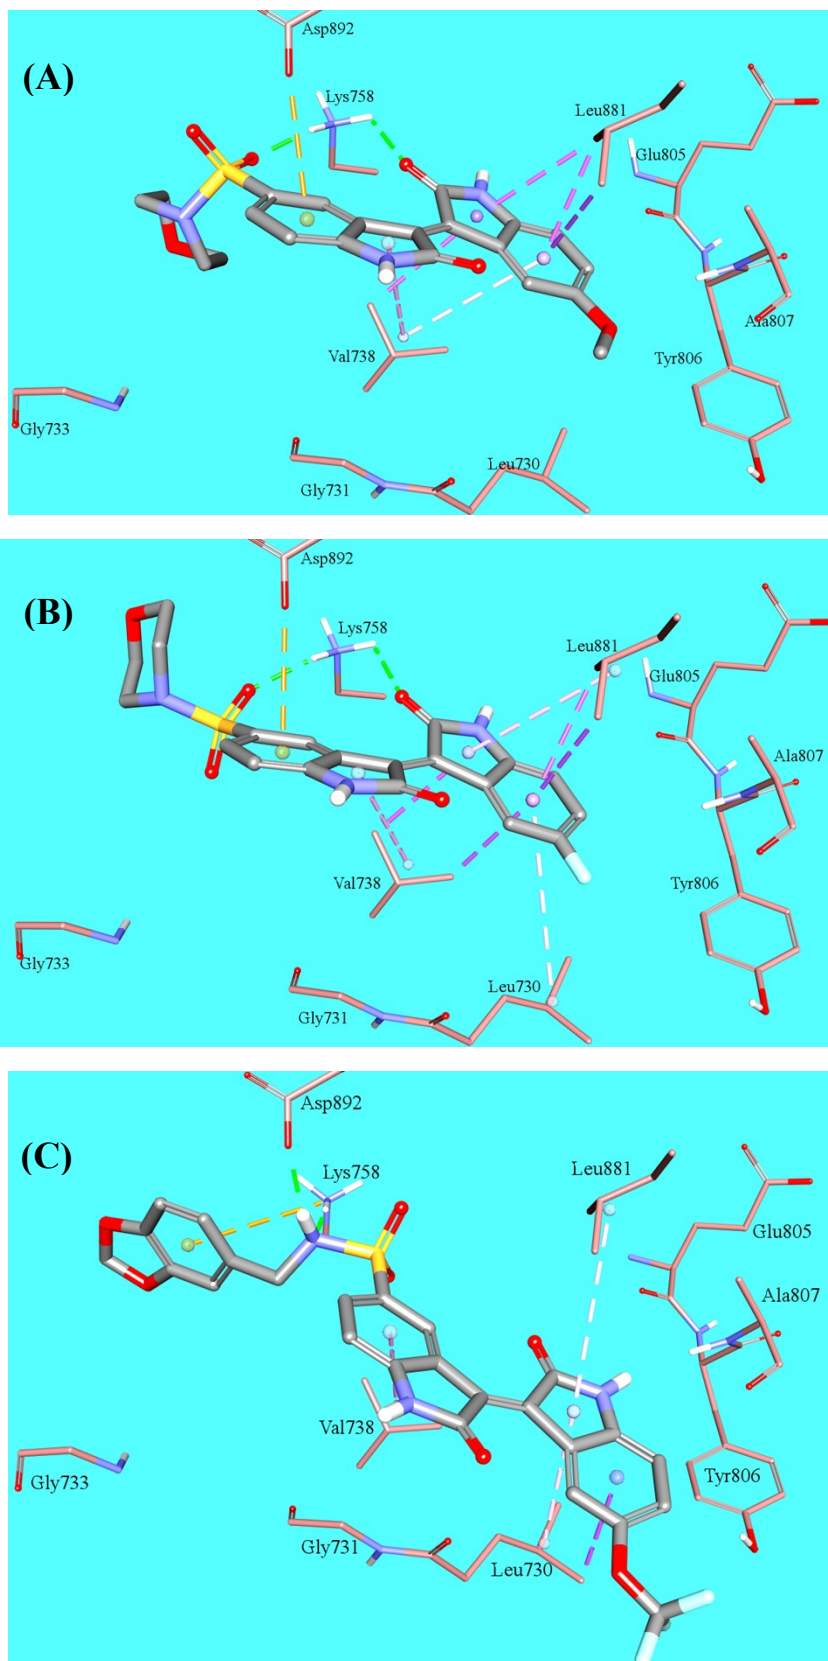

**Figure S3:** Docking of (A) 4d, (B) 4e and (C) 4f into wild type RET kinase. Hydrogen bonds are represented as green dotted lines, hydrophobic interactions are represented as white, pink or light-pink dotted lines. Ionic- $\pi$  stacking interactions are represented by light-orange dotted lines.

**Table S1.** Enthalpic gains upon binding of selected compounds as estimated from CDOCKER interaction energy (Kcal /mol)

| Compound             | Docking into wild-type RET | Docking into mutated RET V804L |
|----------------------|----------------------------|--------------------------------|
| <b>4a</b>            | 38.2                       | 36.9                           |
| <b>4b</b>            | 48.3                       | 50.8                           |
| <b>4c</b>            | 44.4                       | 46.2                           |
| <b>Selpercatinib</b> | 59.7                       | 61.2                           |

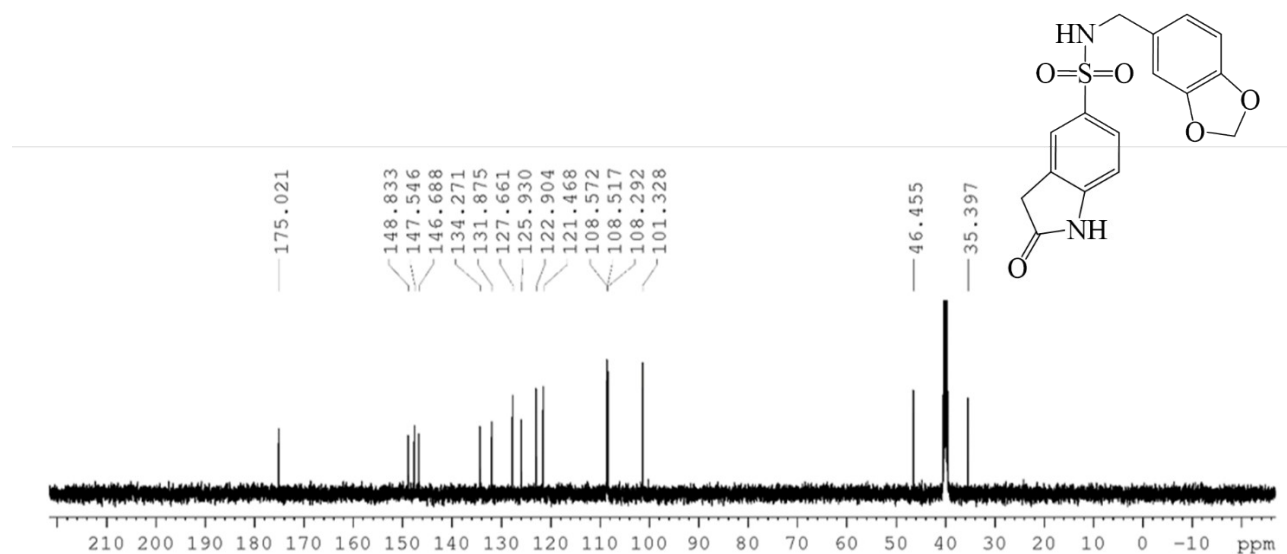

**Figure S4 A:** <sup>13</sup>C-NMR spectrum of compound [2d] DMSO

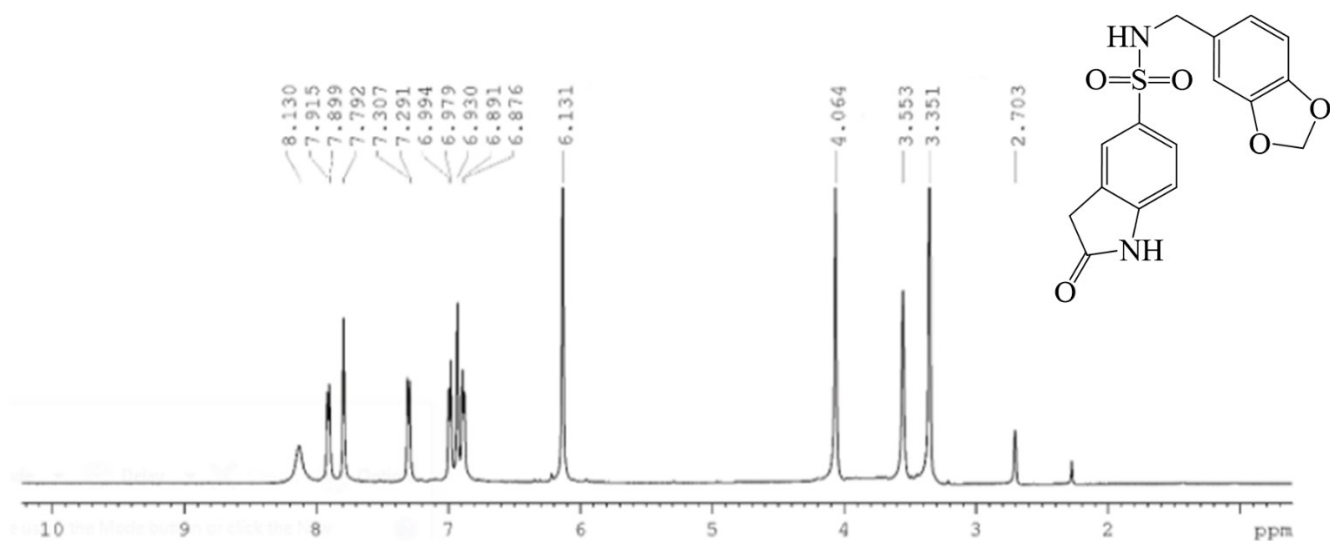

**Figure S4 b:**  $^1\text{H-NMR}$  spectrum of compound [2d] DMSO

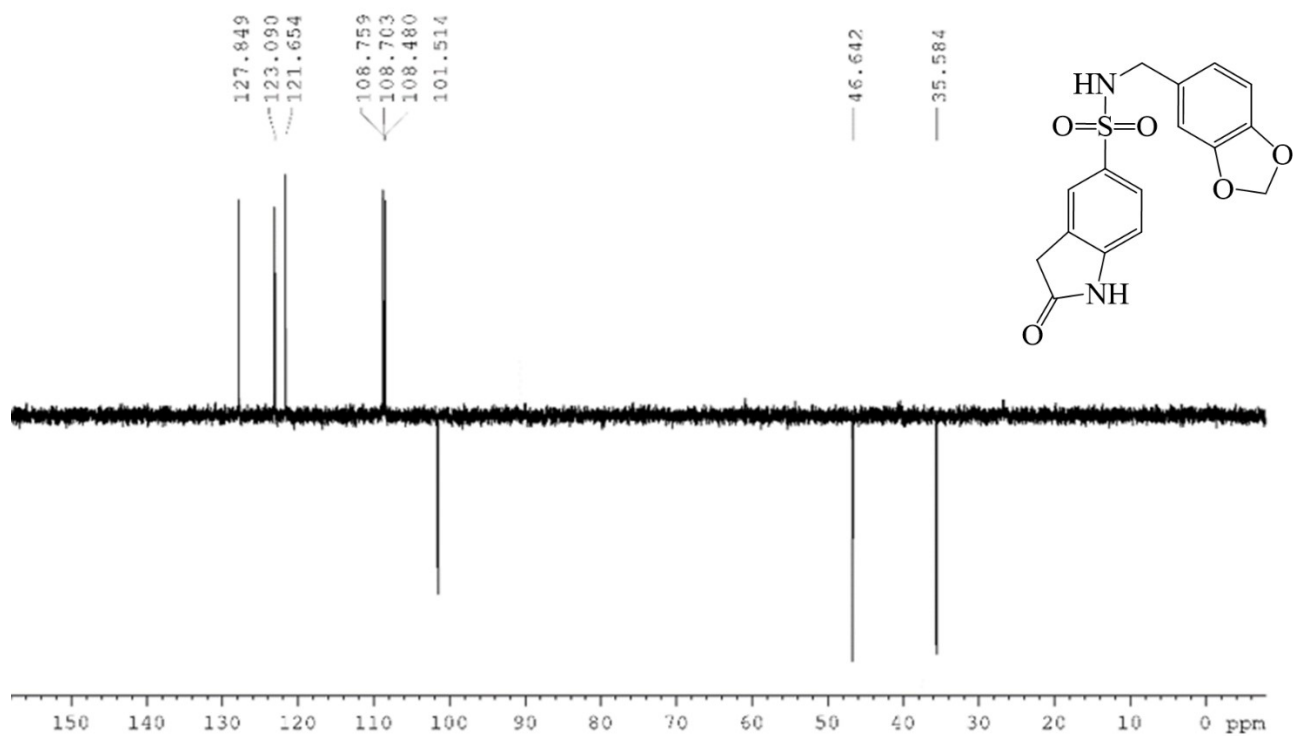

**Figure S4 c:**  $^{13}\text{C-NMR}$  dept 135 spectra of compound [2d] DMSO

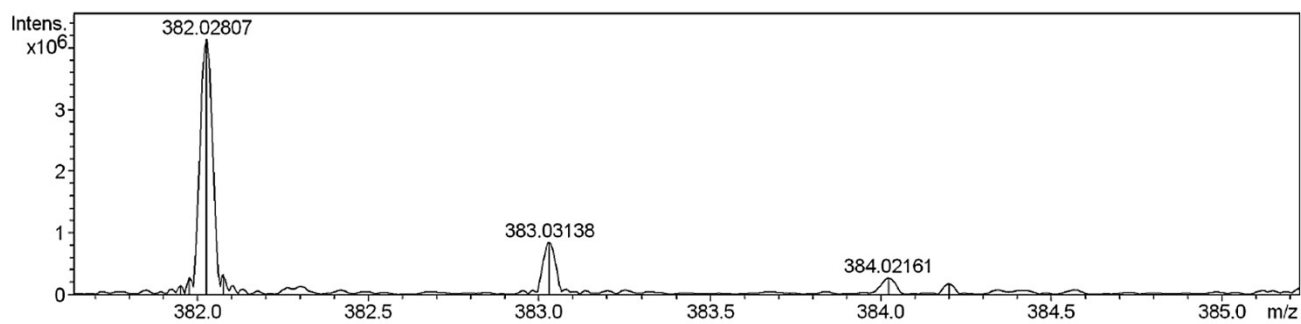

**Figure S5:** Mass spectroscopy chart of (E)-5'-fluoro-2,2'-dioxo-[3,3'-biindolinylidene]-5-sulfonamide (**4a**)

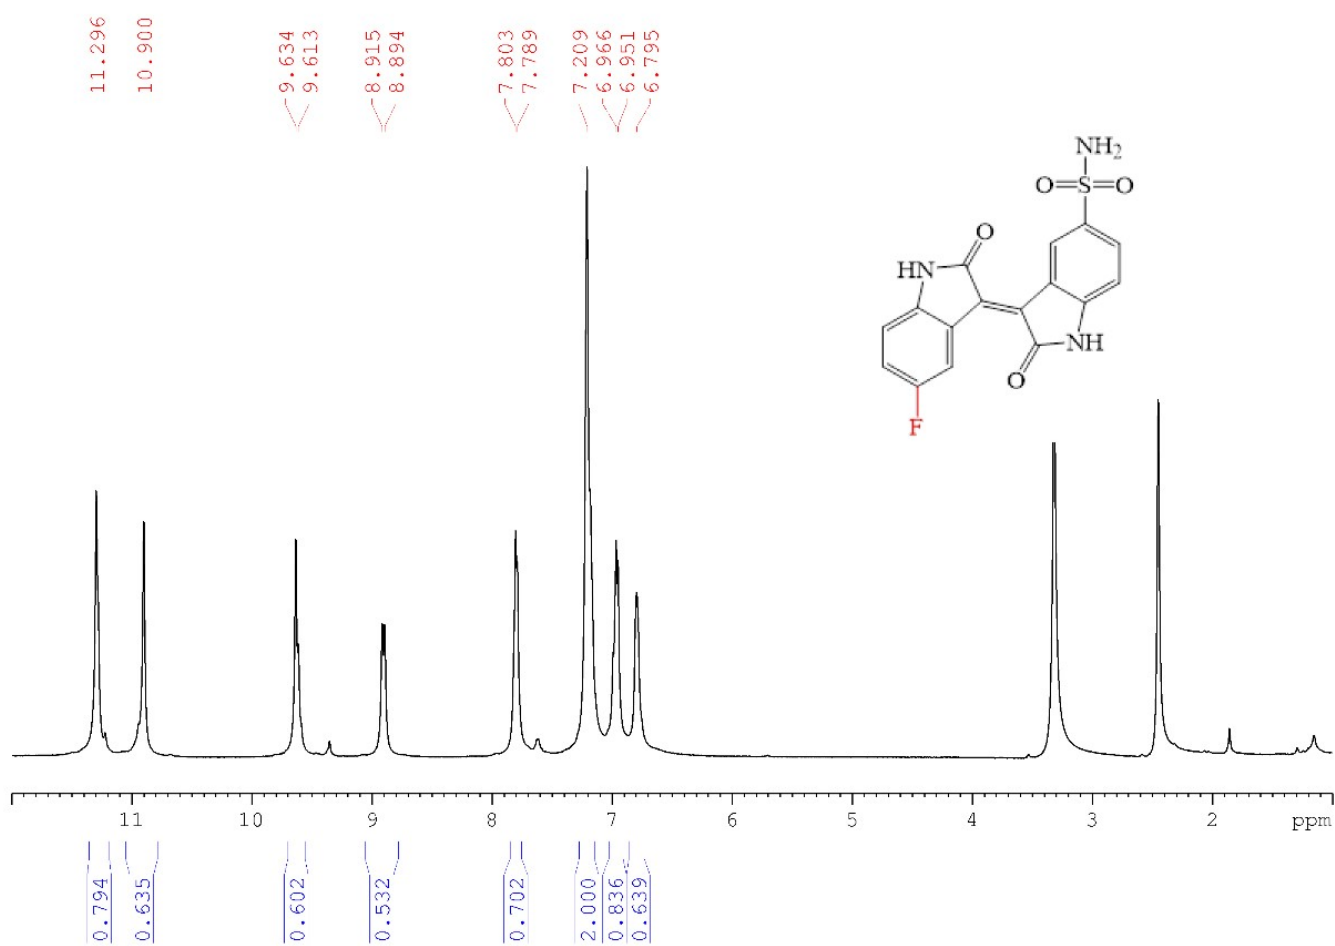

**Figure S5:** (E)-5'-fluoro-2,2'-dioxo-[3,3'-biindolinylidene]-5-sulfonamide (**4a**)

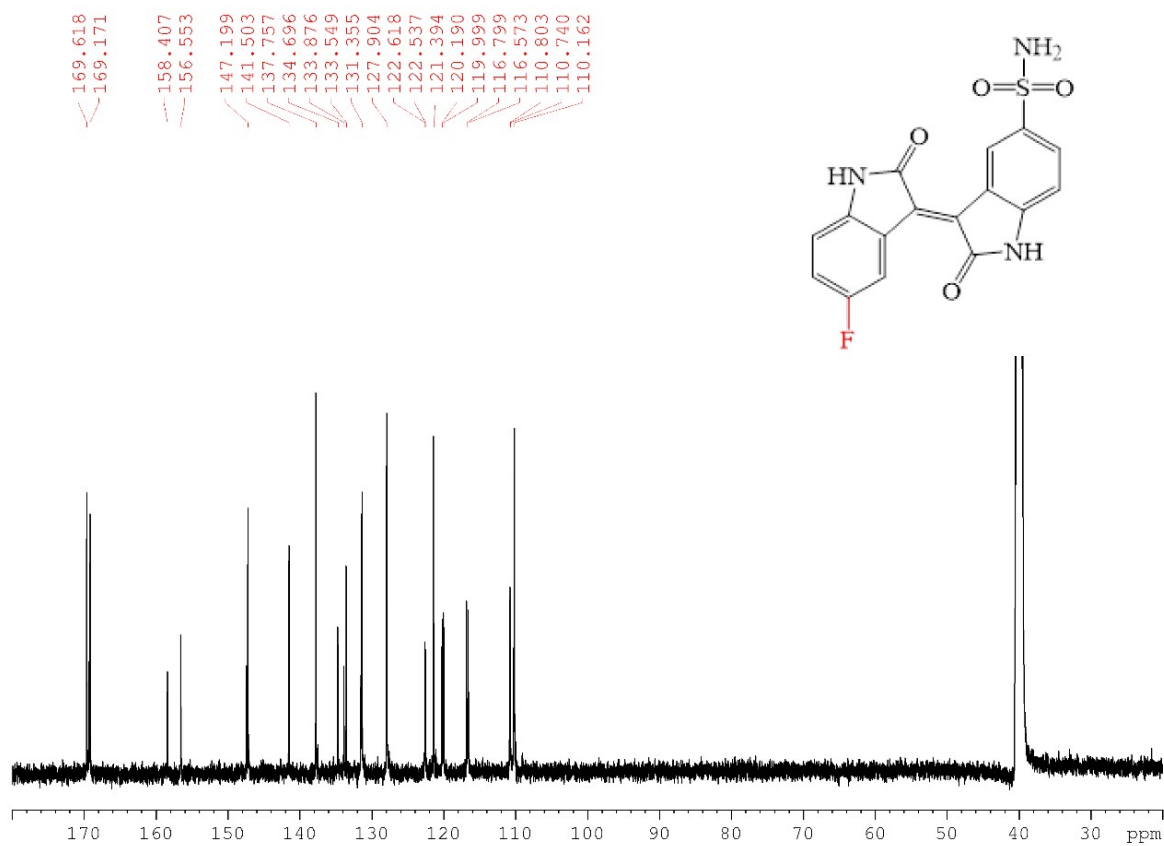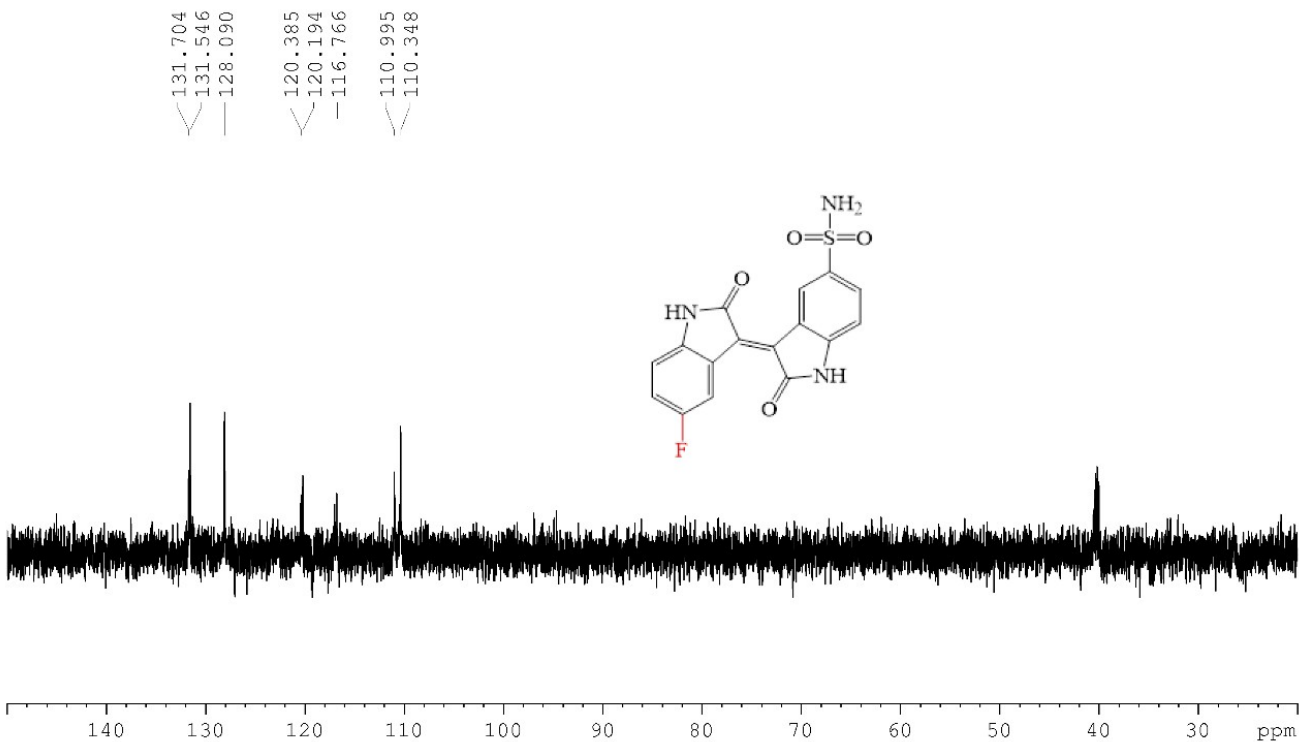

**Figure S5:** (E)-5'-fluoro-2,2'-dioxo-[3,3'-biindolinylidene]-5-sulfonamide (**4a**)

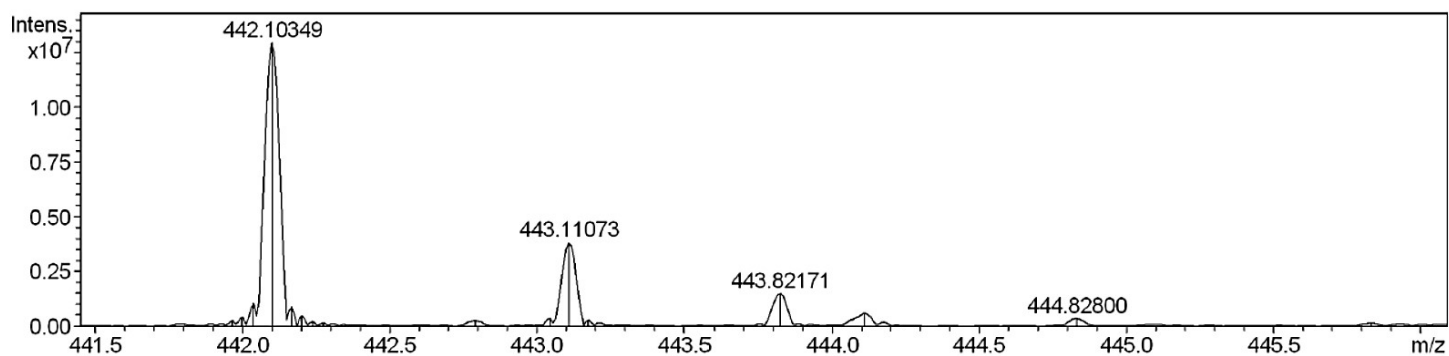

**Figure S6** Mass spectroscopy chart of (E)-6'-methoxy-5-(morpholinosulfonyl)-[3,3'-biindolinydene]-2,2'-dione (**4b**)

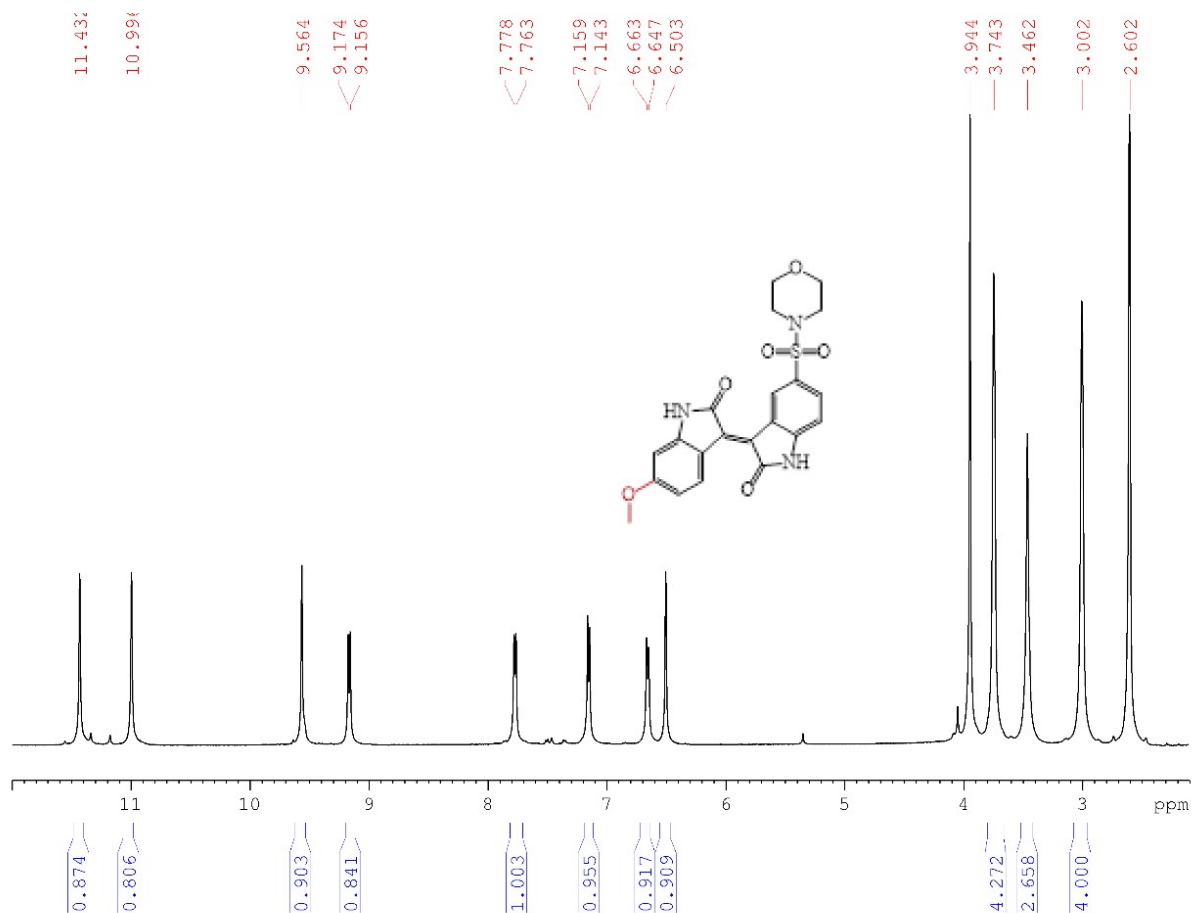

**Figure S6** (E)-6'-methoxy-5-(morpholinosulfonyl)-[3,3'-biindolinydene]-2,2'-dione (**4b**)

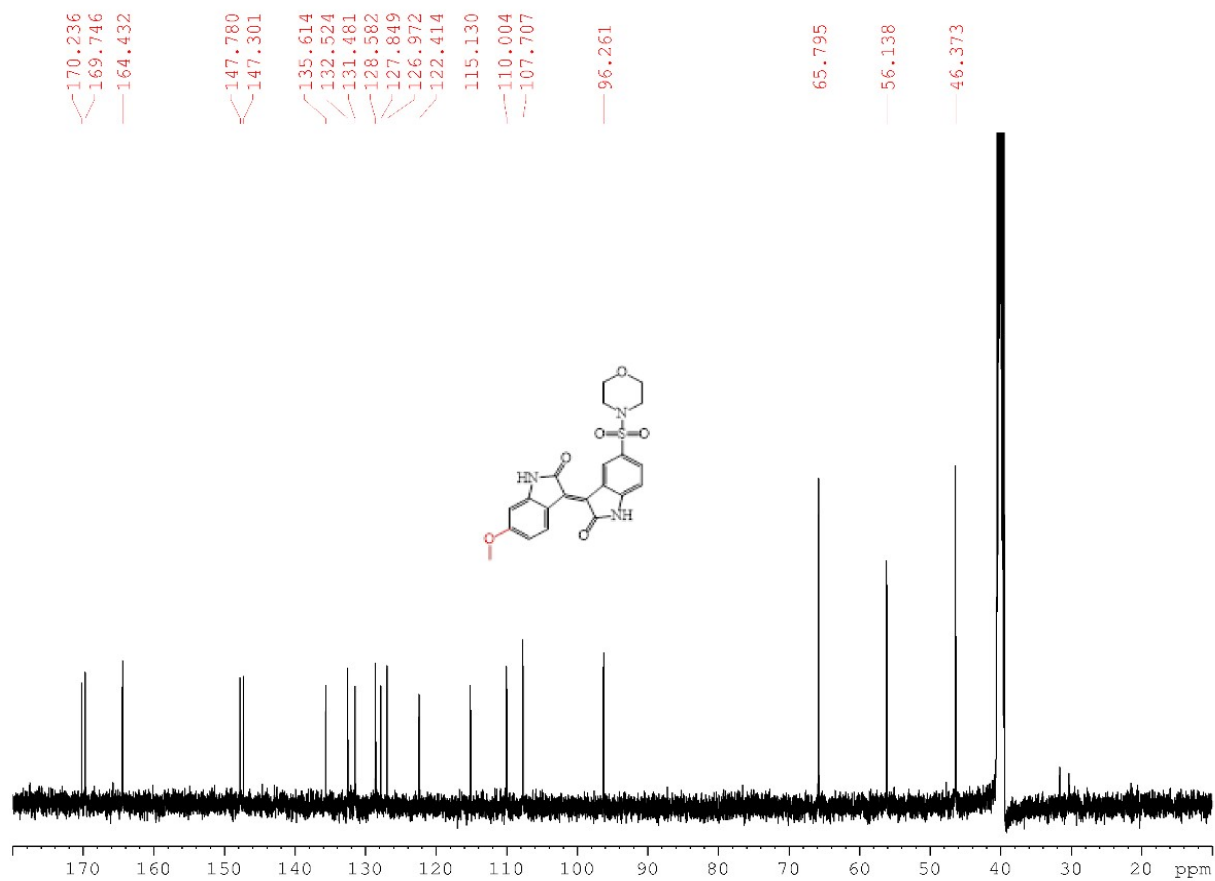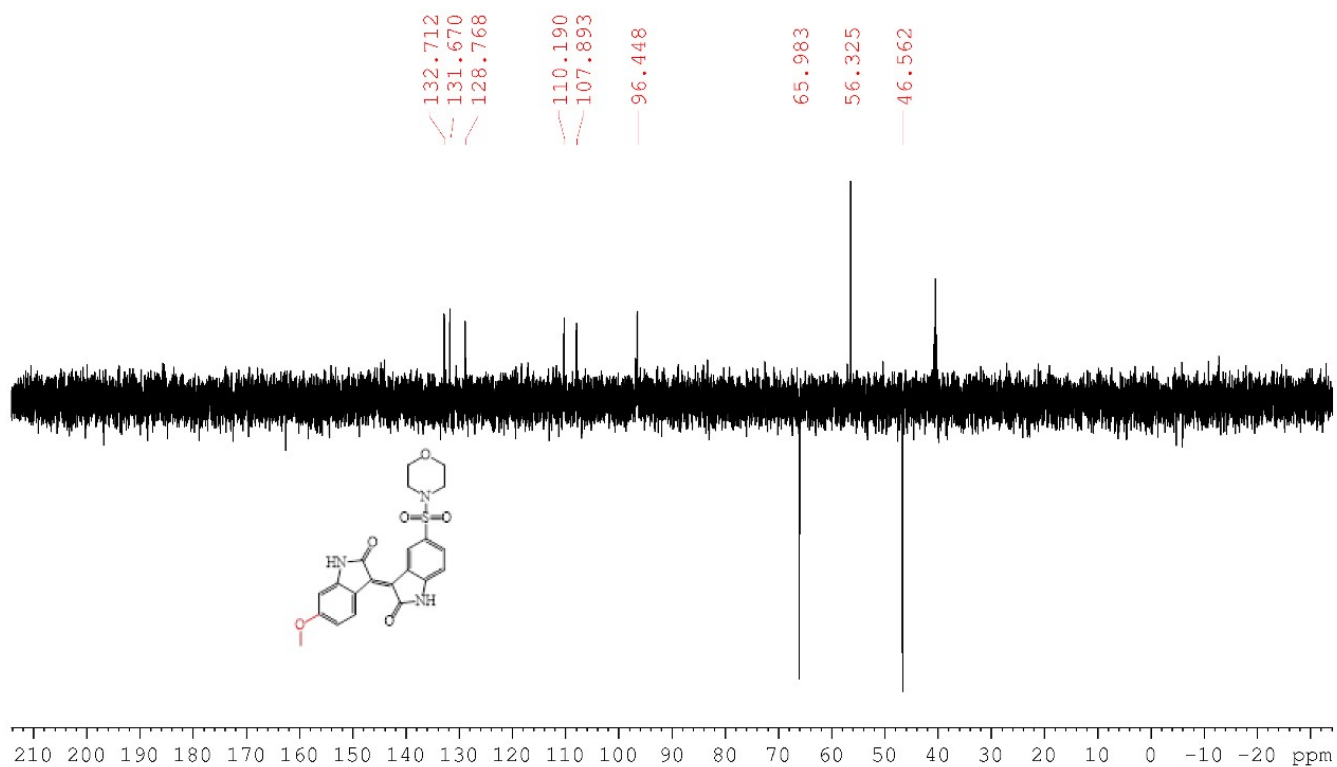

**Figure S6** (E)-6'-methoxy-5-(morpholinosulfonyl)-[3,3'-biindolinylidene]-2,2'-dione (**4b**)

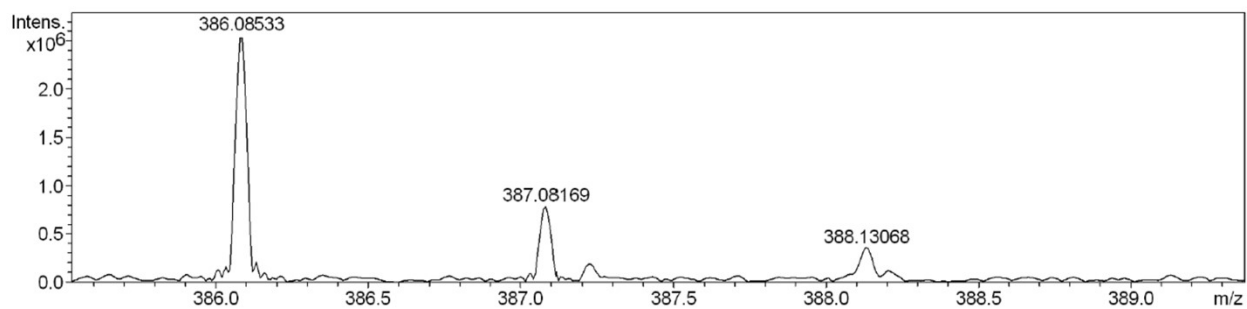

**Figure S7** Mass spectroscopy chart of (E)-6'-methoxy-N-methyl-2,2'-dioxo-[3,3'-biindolinylidene]-5-sulfonamide (**4c**)

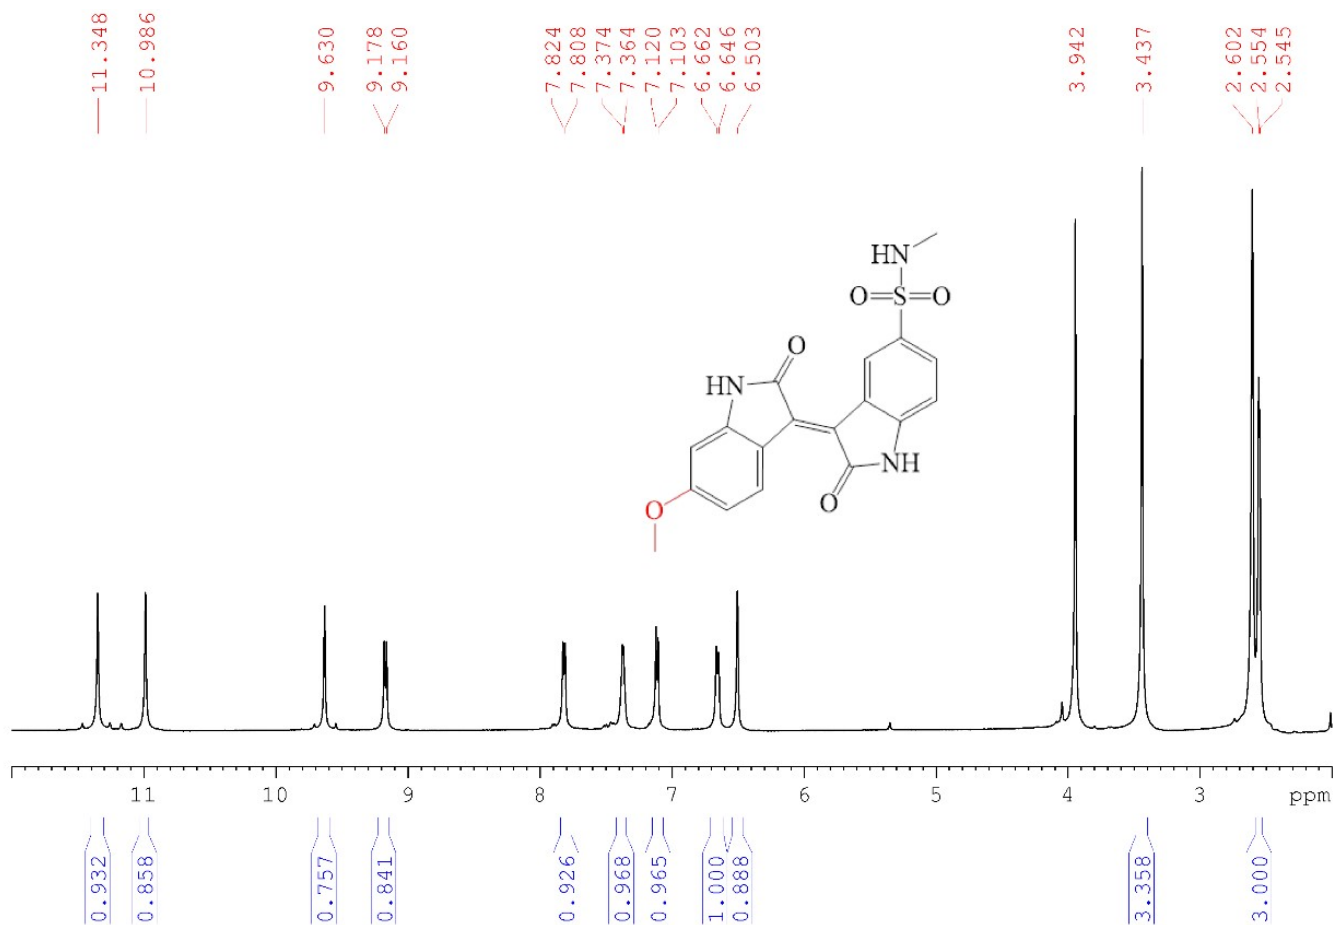

**Figure S7** (E)-6'-methoxy-N-methyl-2,2'-dioxo-[3,3'-biindolinylidene]-5-sulfonamide (**4c**)

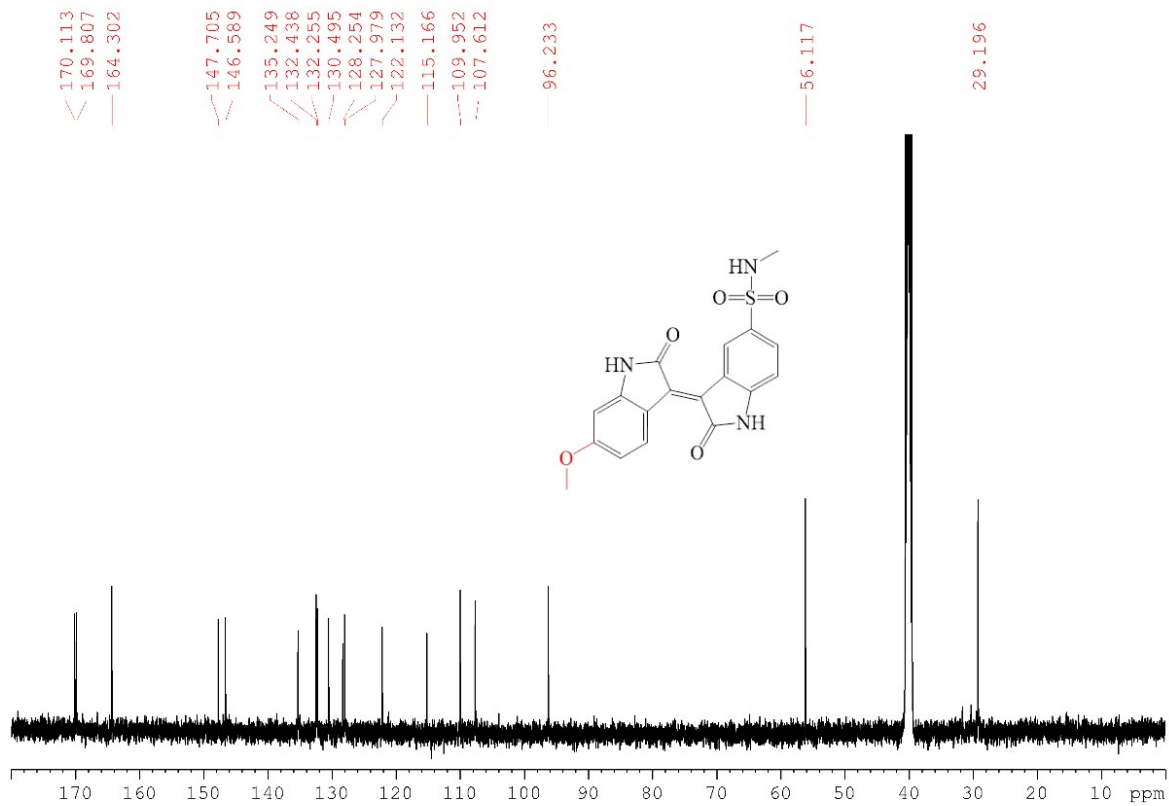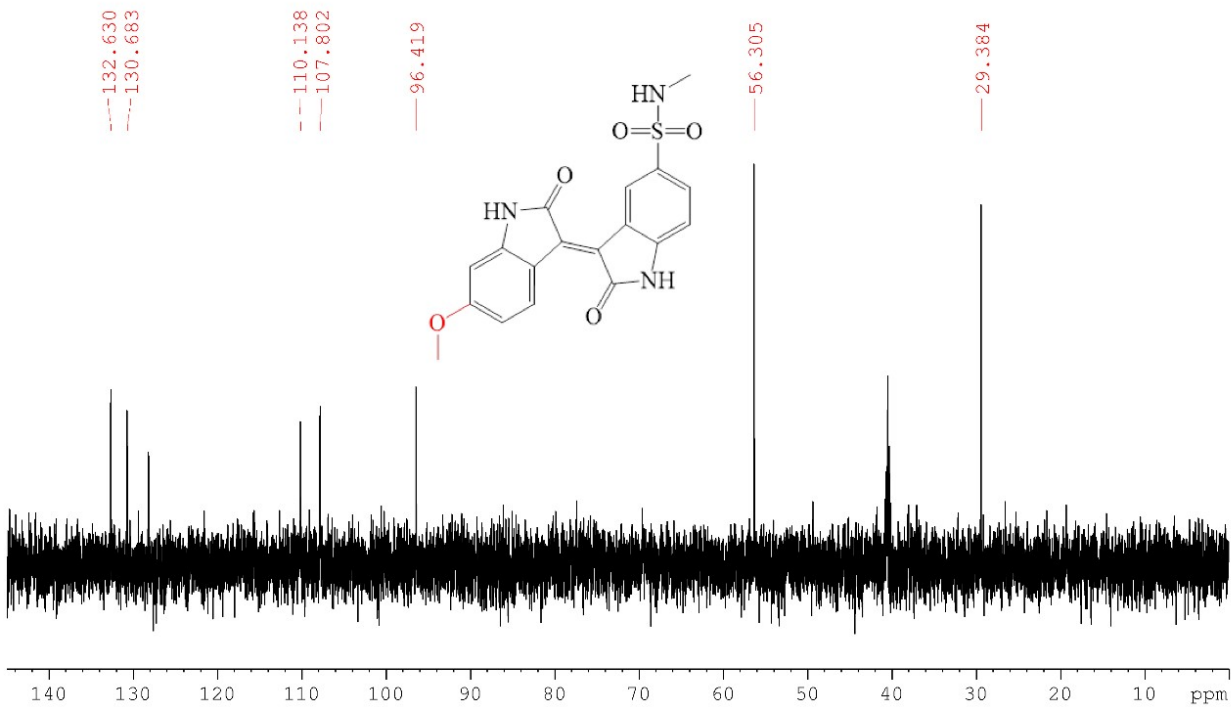

**Figure S7** (E)-6'-methoxy-N-methyl-2,2'-dioxo-[3,3'-biindolinylidene]-5-sulfonamide (**4c**)

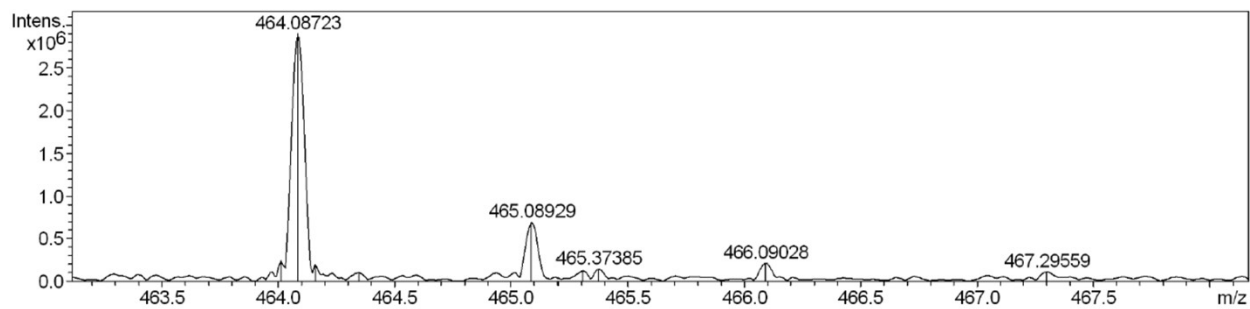

**Figure S8** Mass spectroscopy chart of (E)-5-methoxy-5'-(morphinosulfonyl)-[3,3'-biindolinydene]-2,2'-dione (**4d**)

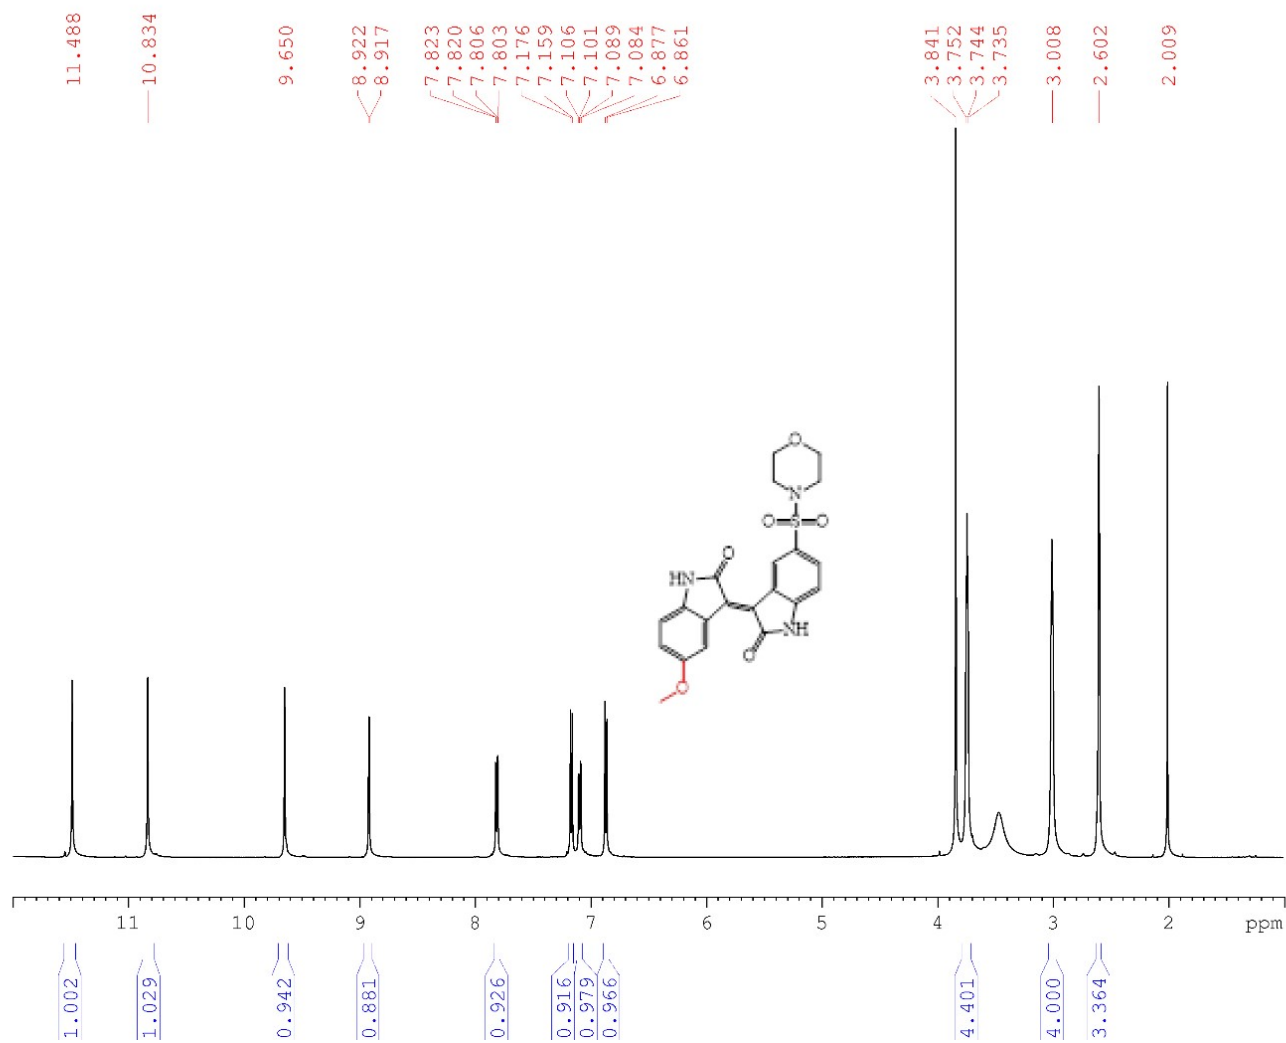

**Figure S8** (E)-5-methoxy-5'-(morphinosulfonyl)-[3,3'-biindolinydene]-2,2'-dione (**4d**)

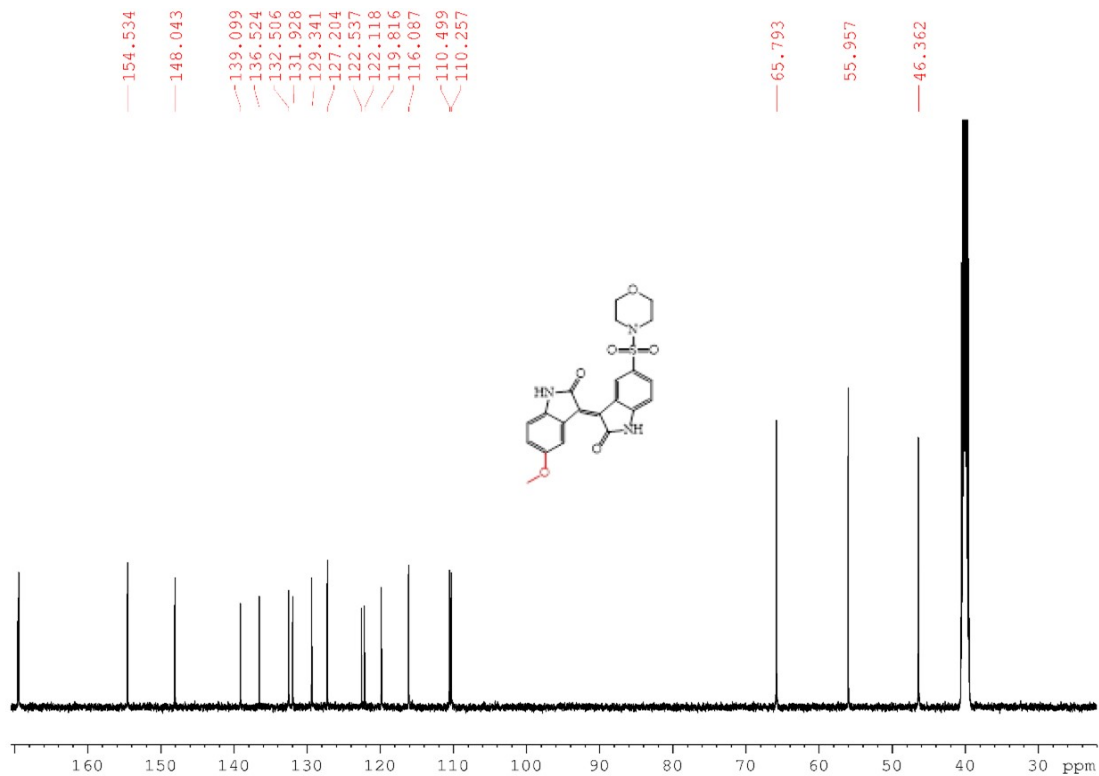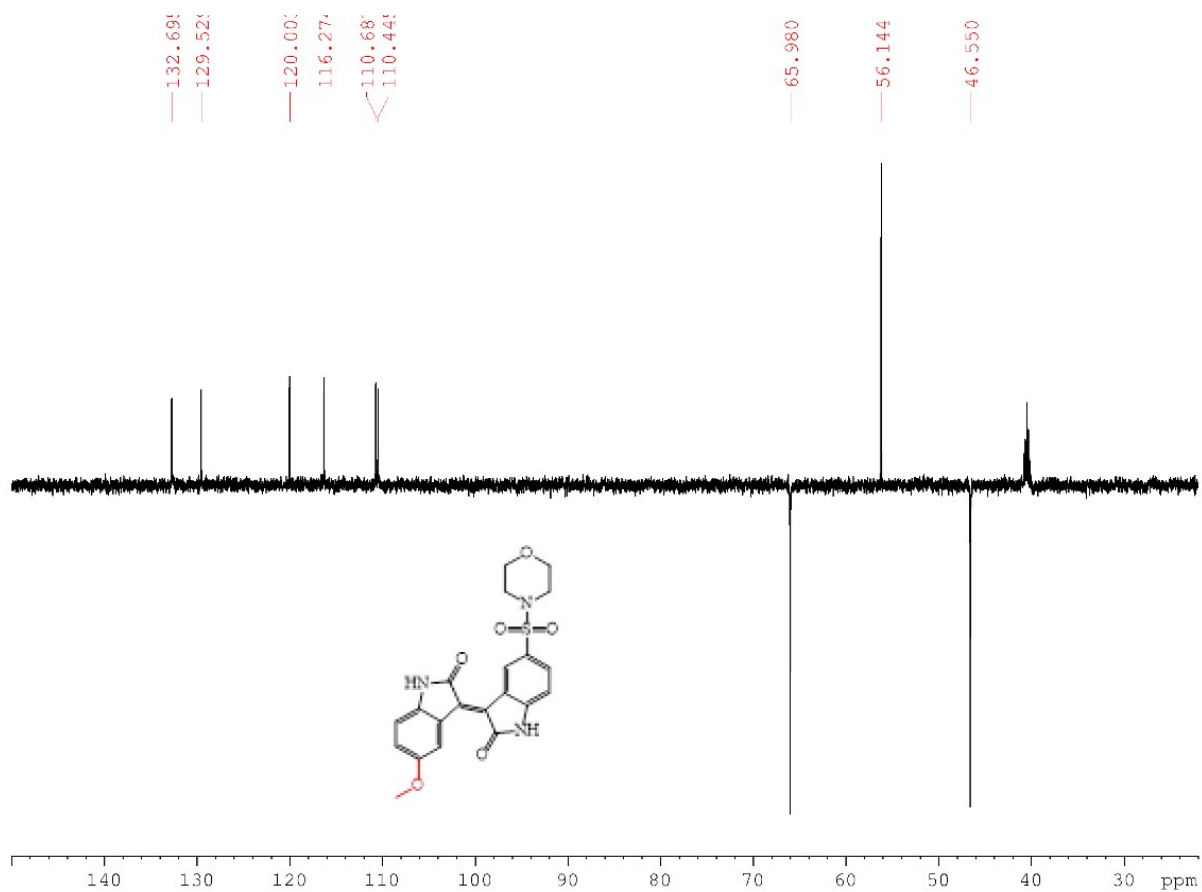

**Figure S8** (E)-5-methoxy-5'-(morpholinosulfonyl)-[3,3'-biindolinylidene]-2,2'-dione (**4d**)

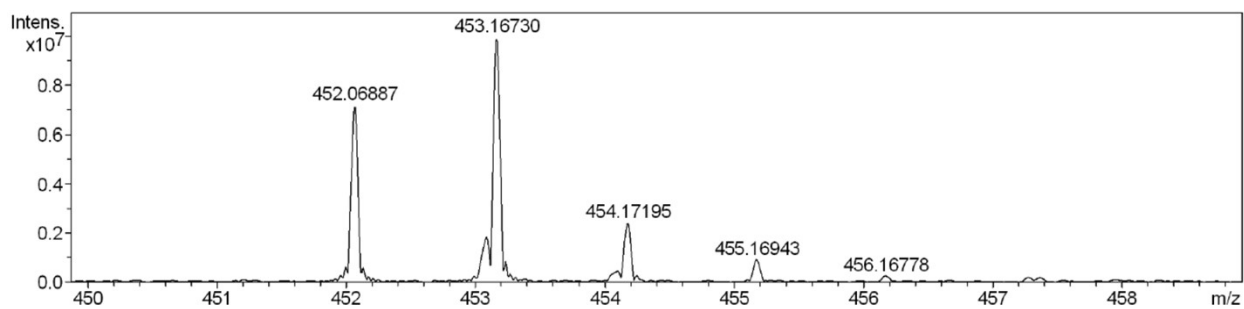

**Figure S9** Mass spectroscopy chart of (E)-5-fluoro-5'-(morphinosulfonyl)-[3,3'-biindolinylidene]-2,2'-dione (**4e**)

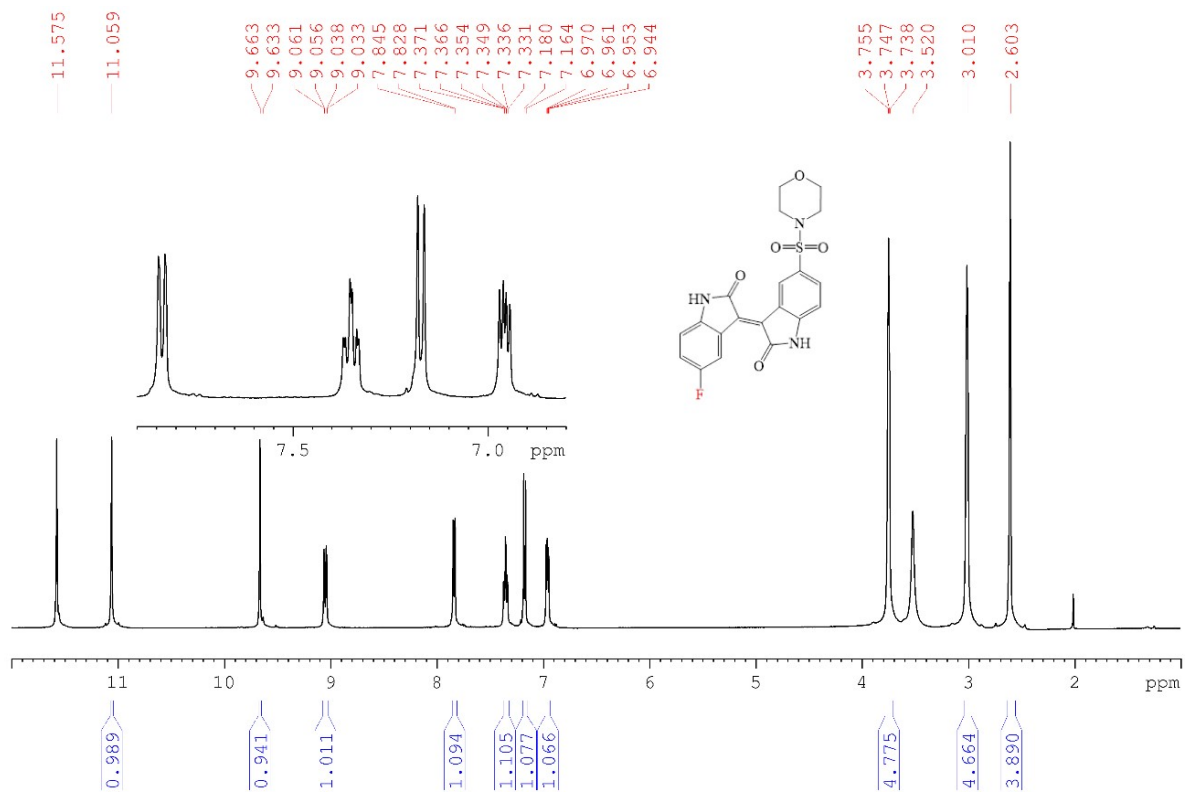

**Figure S9** (E)-5-fluoro-5'-(morphinosulfonyl)-[3,3'-biindolinylidene]-2,2'-dione (**4e**)

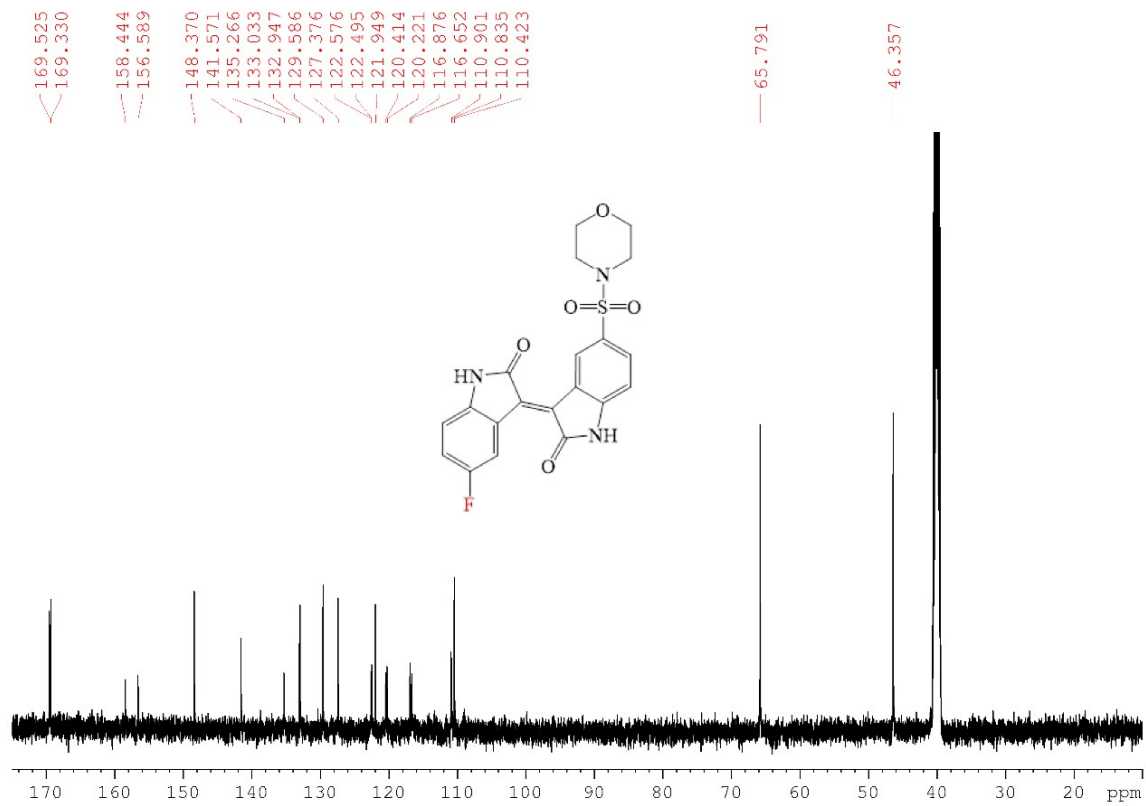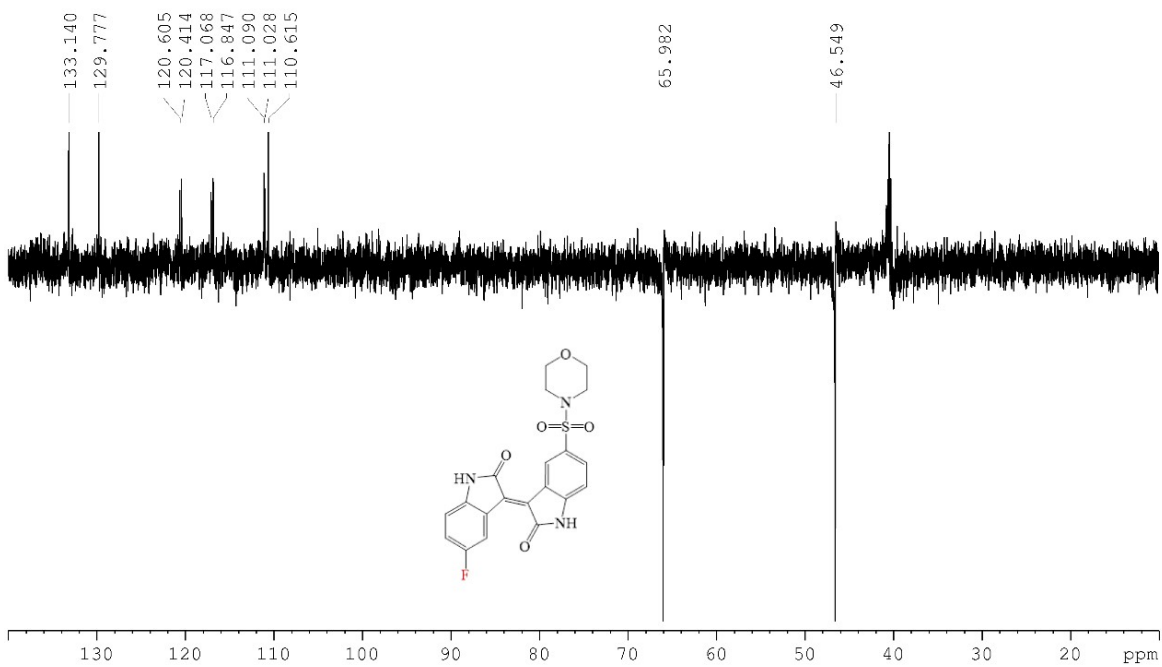

**Figure S9** (E)-5-fluoro-5'-(morpholinosulfonyl)-[3,3'-biindolinylidene]-2,2'-dione (**4e**)

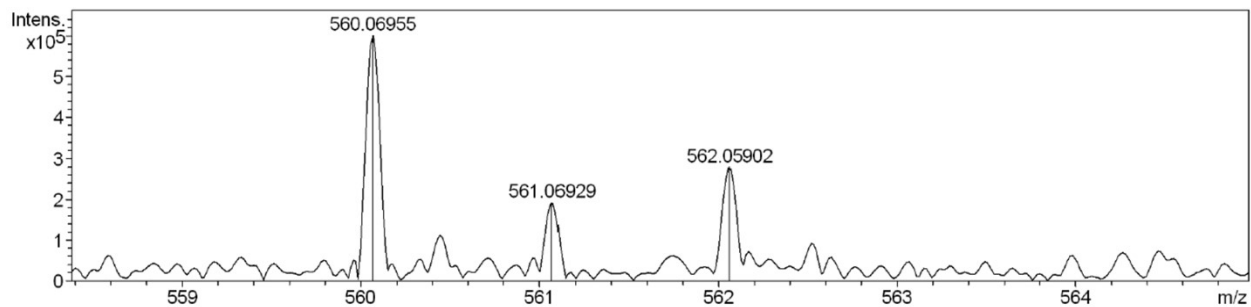

**Figure S10** Mass spectroscopy chart of (E)-N-(benzo[d][1,3]dioxol-5-ylmethyl)-2,2'-dioxo-5'-(trifluoromethoxy)-[3,3'-biindolinylidene]-5-sulfonamide (**4f**)

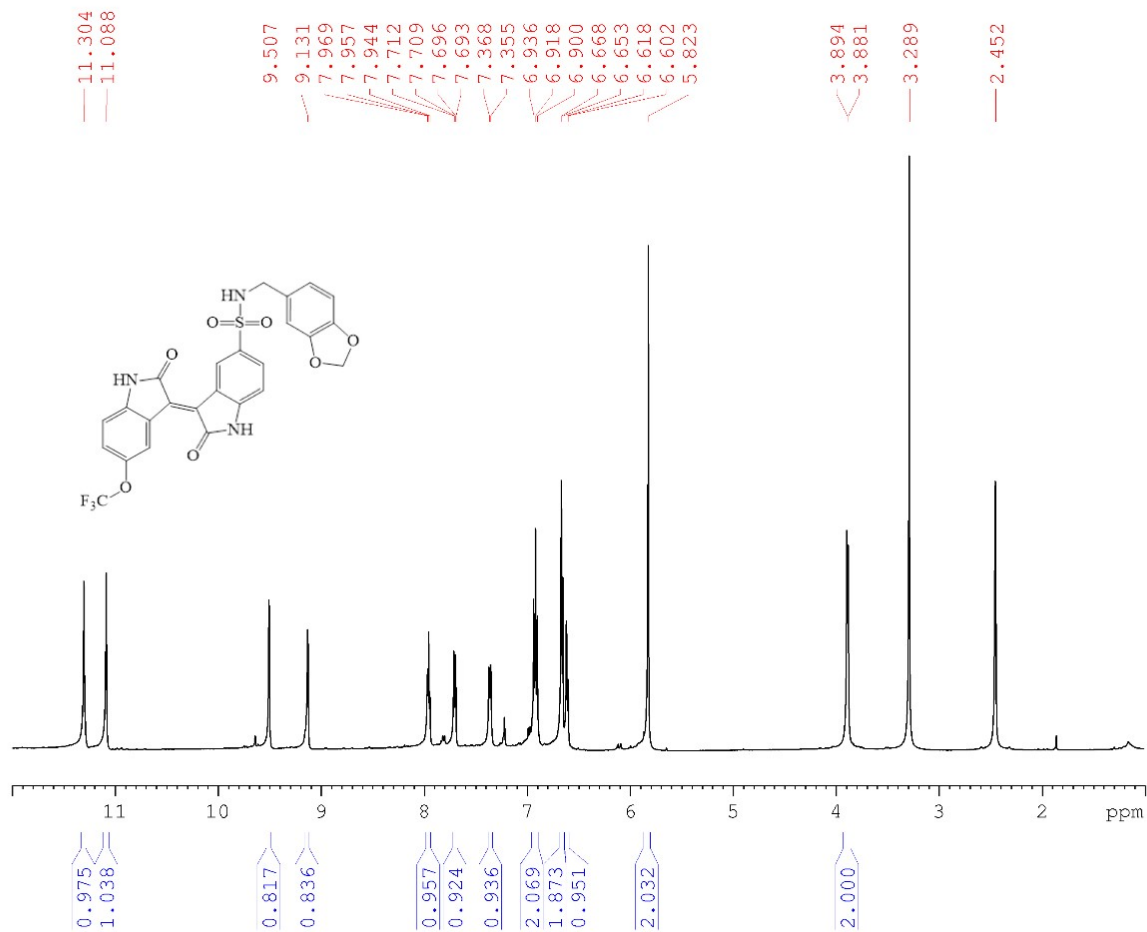

**Figure S10** (E)-N-(benzo[d][1,3]dioxol-5-ylmethyl)-2,2'-dioxo-5'-(trifluoromethoxy)-[3,3'-biindolinylidene]-5-sulfonamide (**4f**)

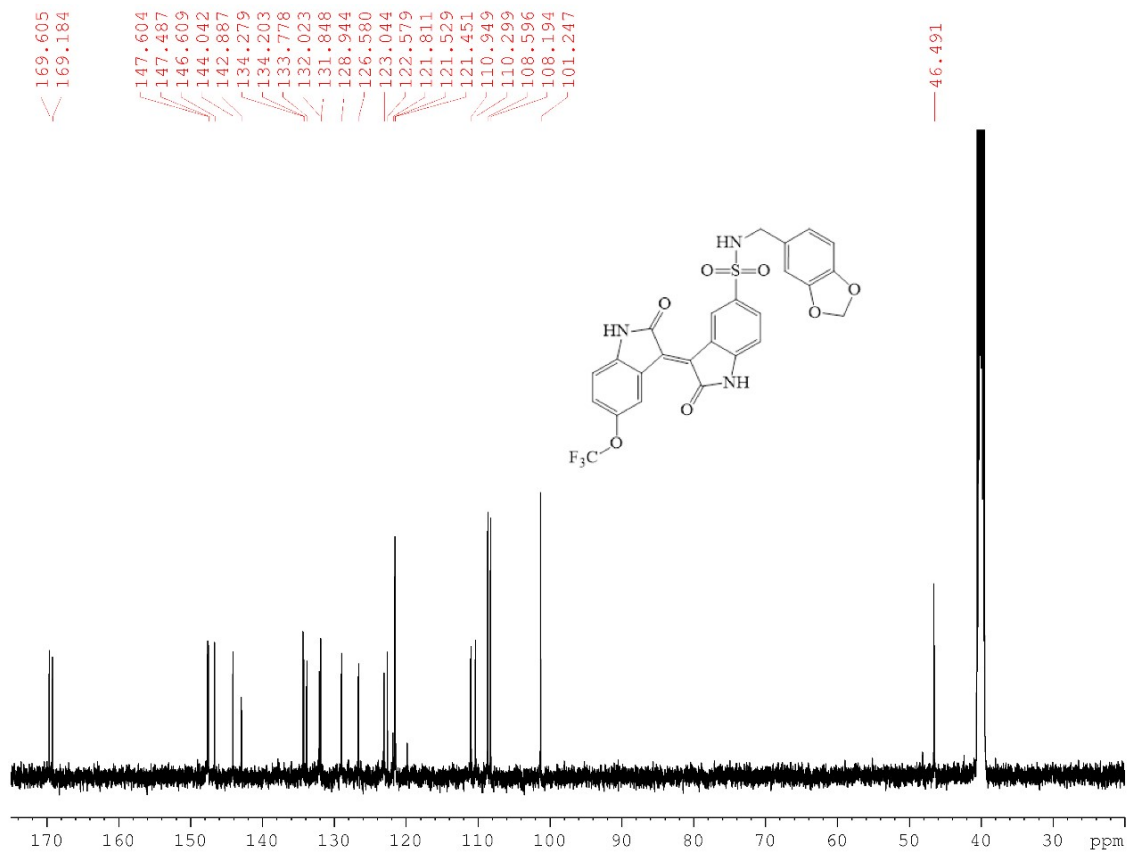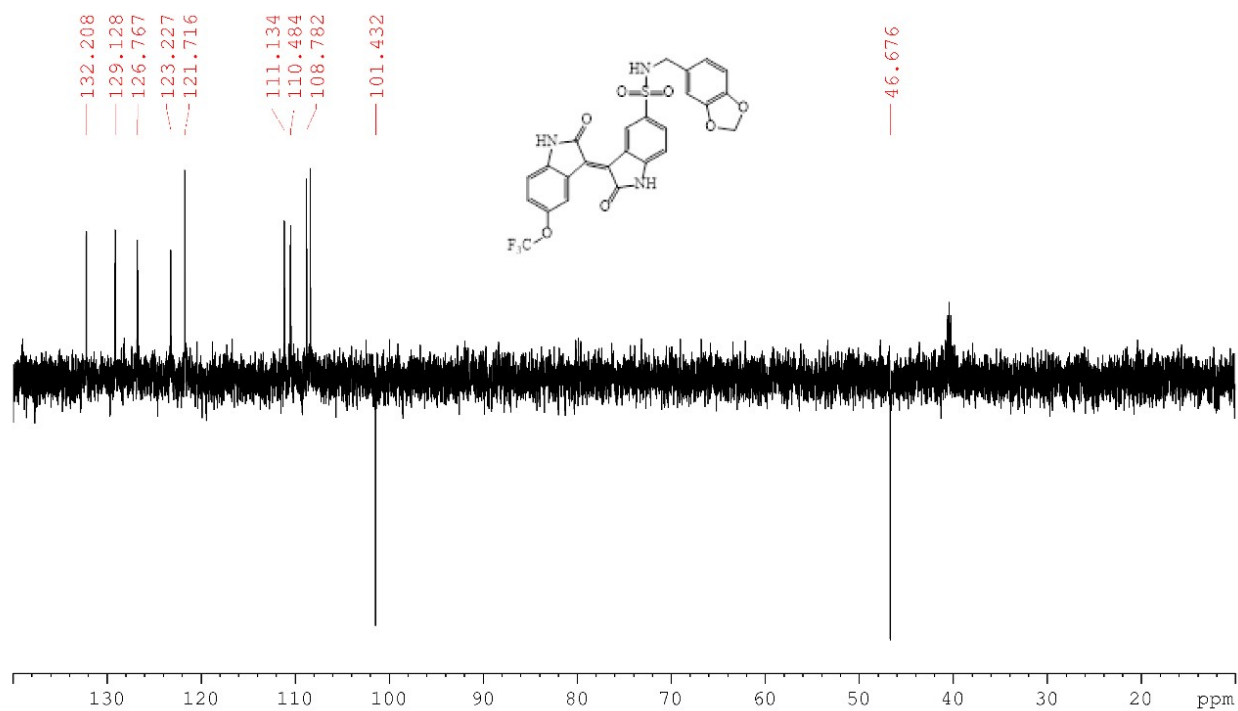

**Figure S10** (E)-N-(benzo[d][1,3]dioxol-5-ylmethyl)-2,2'-dioxo-5'-(trifluoromethoxy)-[3,3'-biindolinylidene]-5-sulfonamide (**4f**)
